# Supplementary material for: Genome-wide association analysis implicates dysregulation of immunity genes in chronic lymphocytic leukaemia
Source: PubMed Central journal article supplement (PMC5303820; doi:10.1038/ncomms14175), 2017-02-06
Supplement: ncomms14175-s1.pdf [file ncomms14175-s1.pdf]

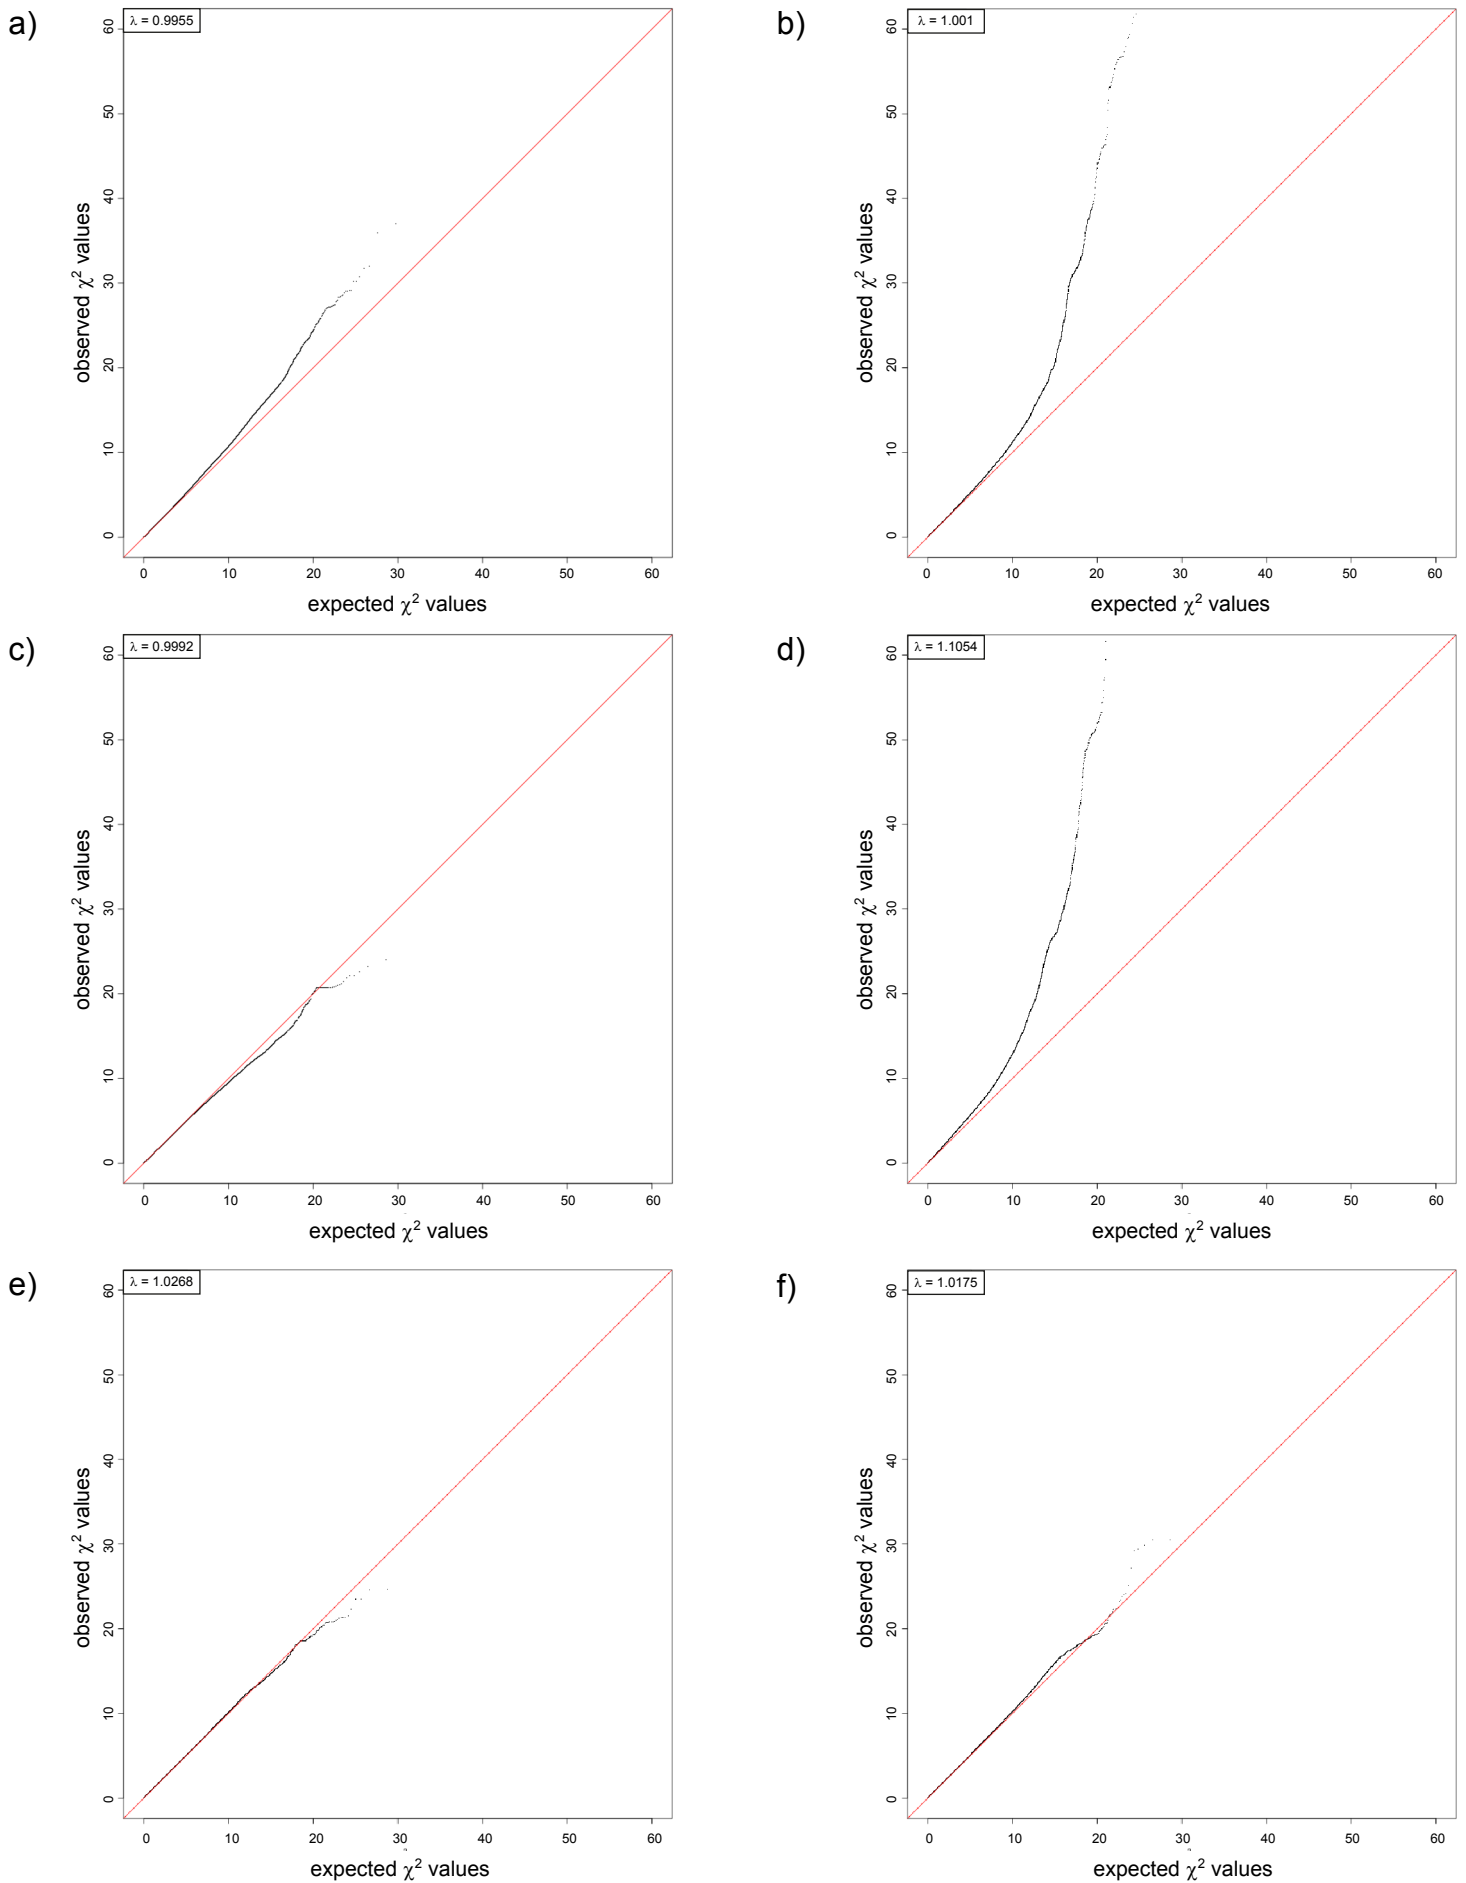

**Supplementary Figure 1: Quantile-Quantile (Q-Q) plots of observed and expected  $\chi^2$  values of association between SNP genotype and risk of chronic lymphocytic leukemia.**  
 a) UK-CLL1, b) UK-CLL2, c) GEC, d) NHL GWAS, e) UCSF and f) Utah. The red line represents the null hypothesis of no true association.

a) rs34676223

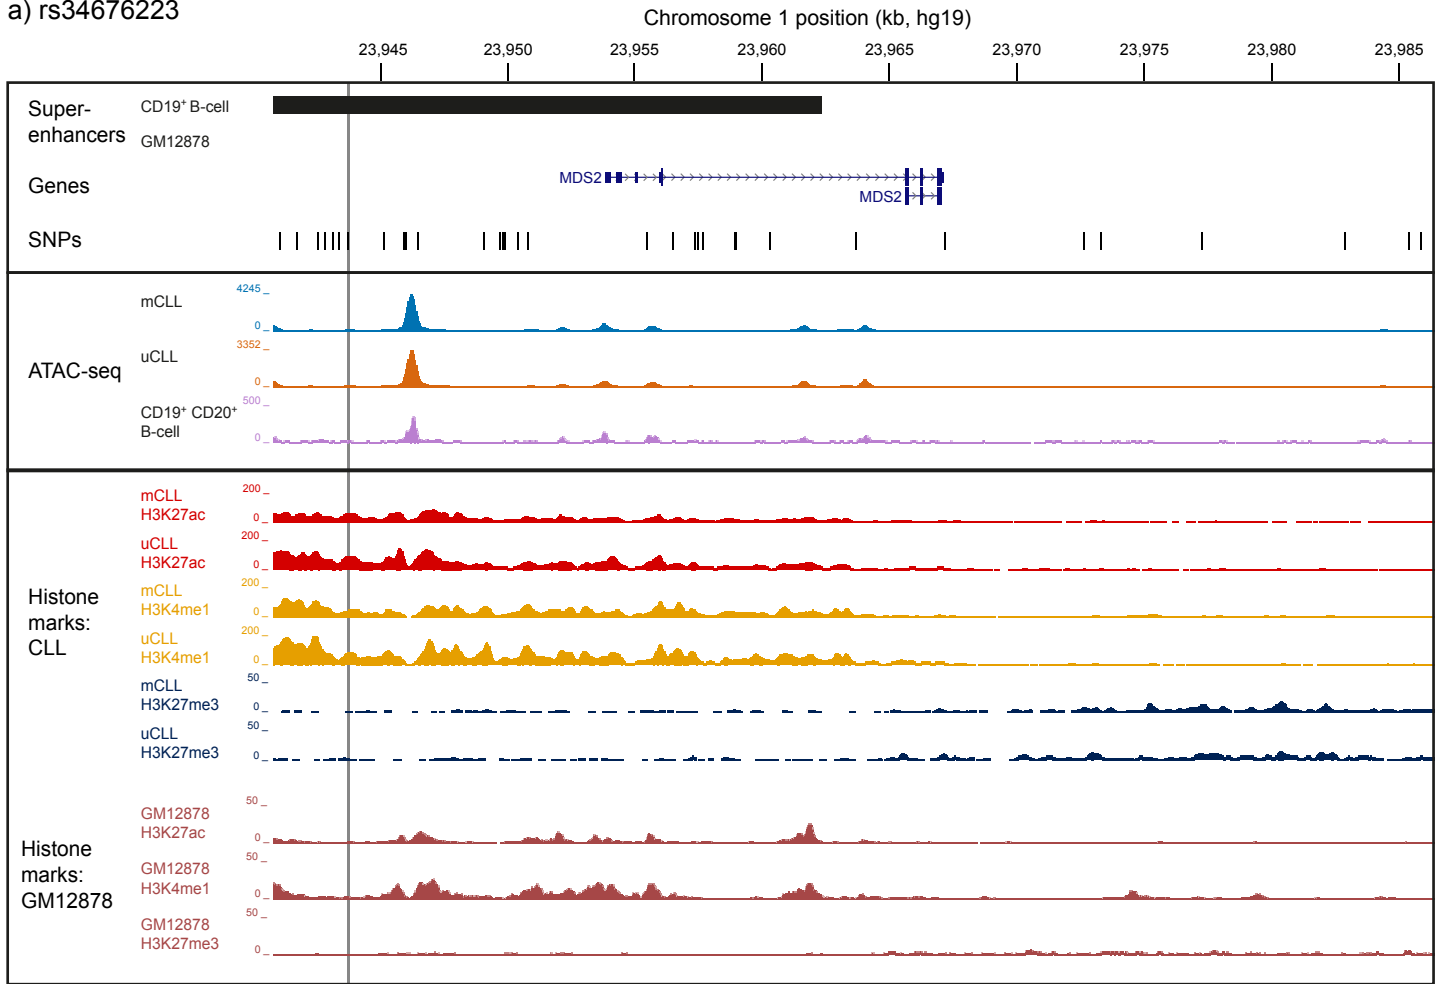

b) rs41271473

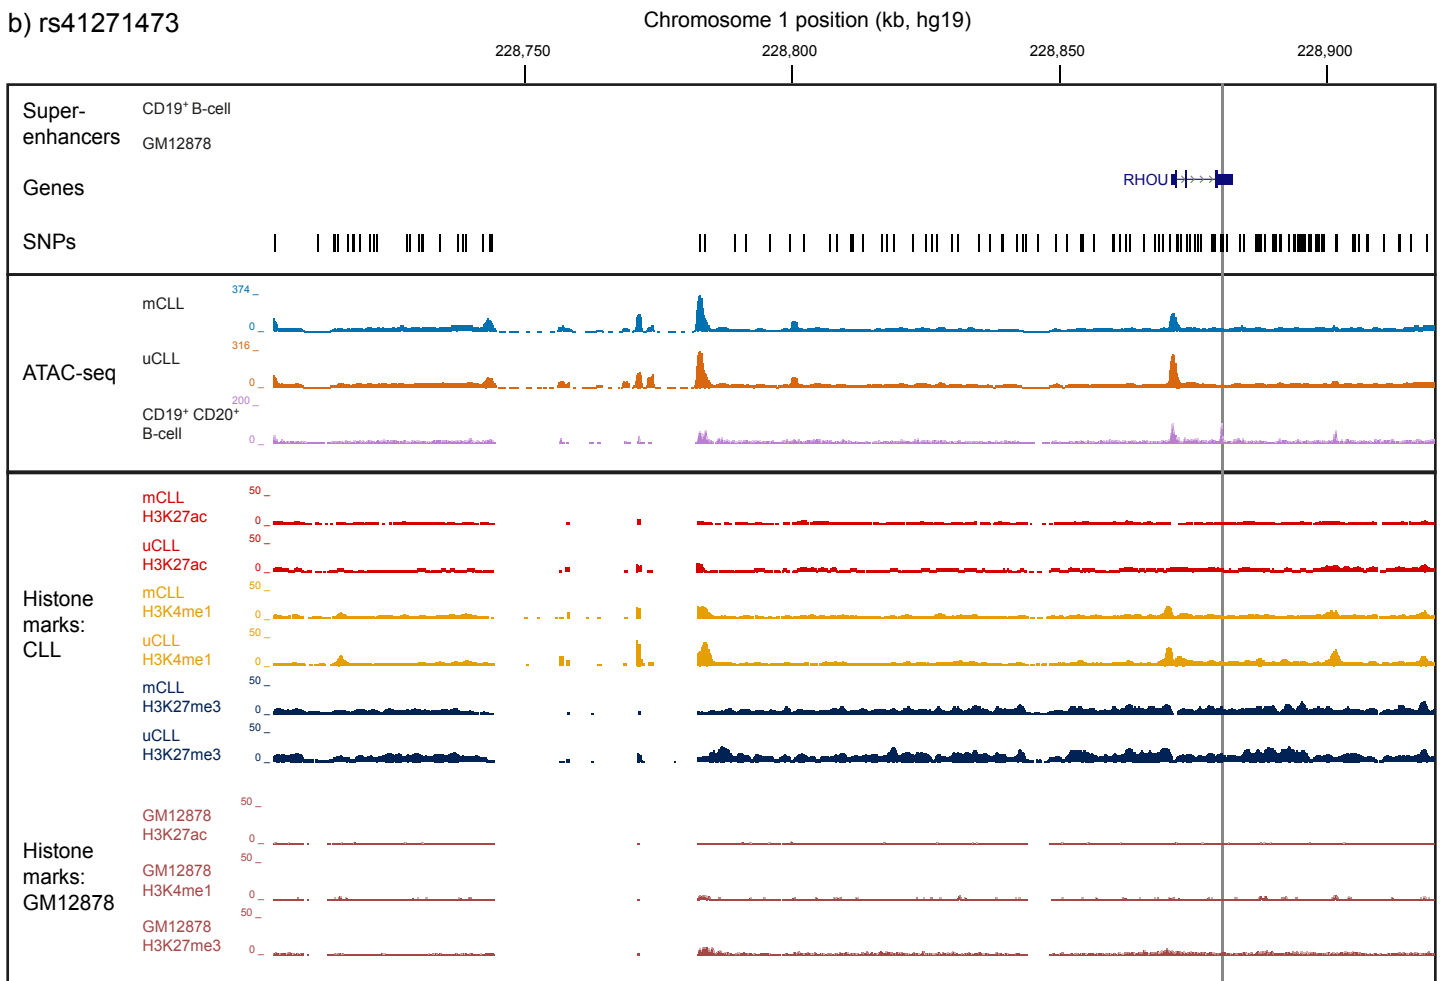

Supplementary Figure 2

c) rs71597109

Chromosome 4 position (kb, hg19)

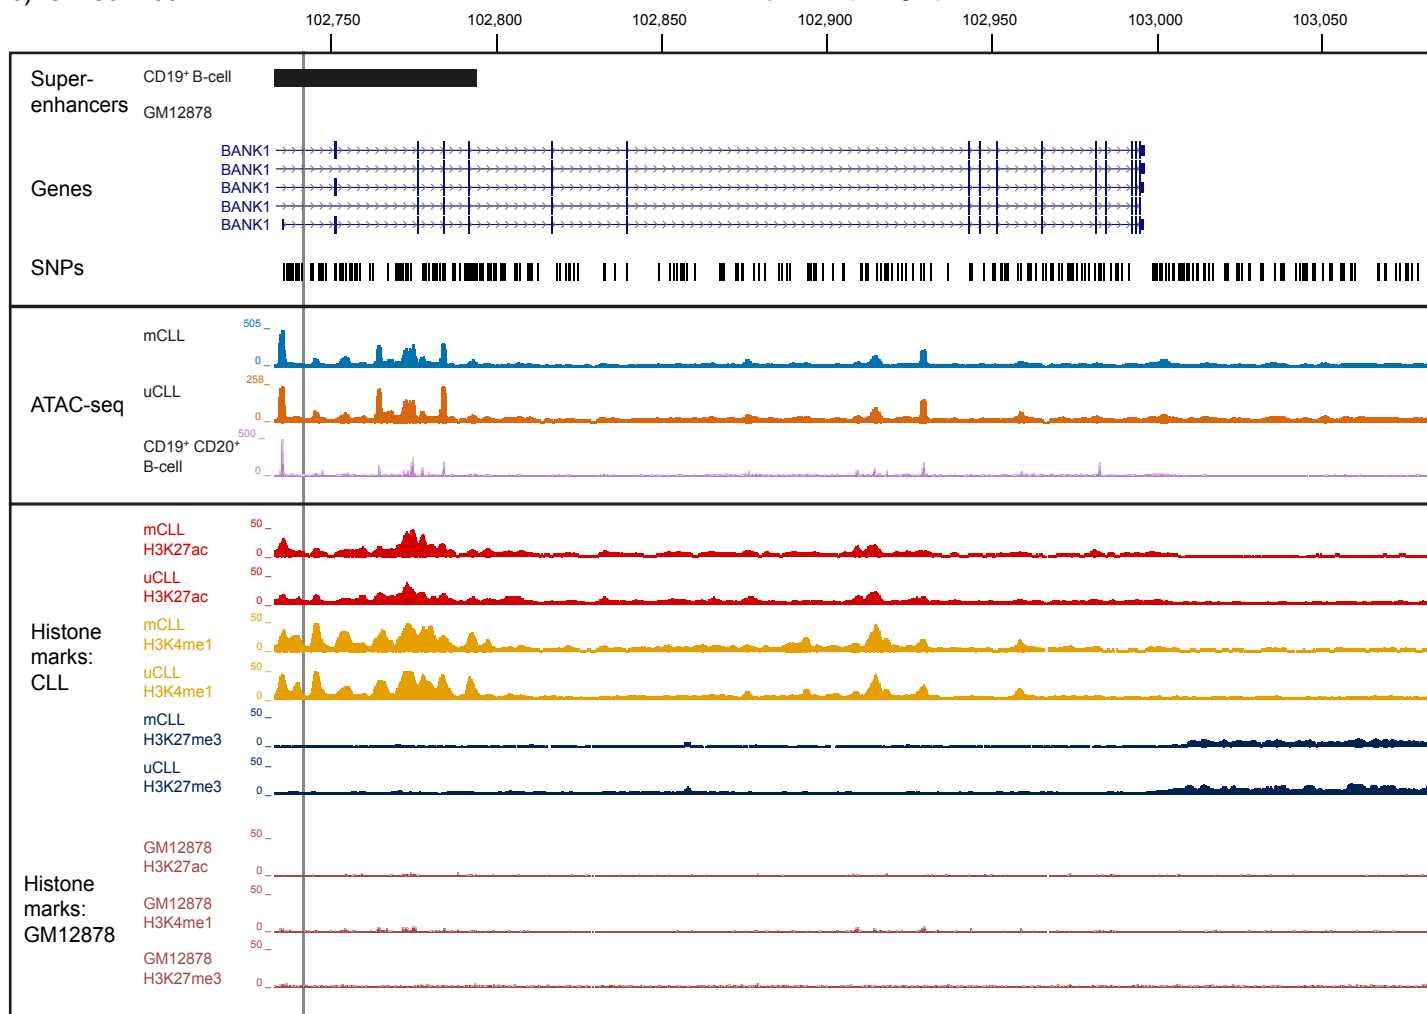

d) rs57214277

Chromosome 4 position (kb, hg19)

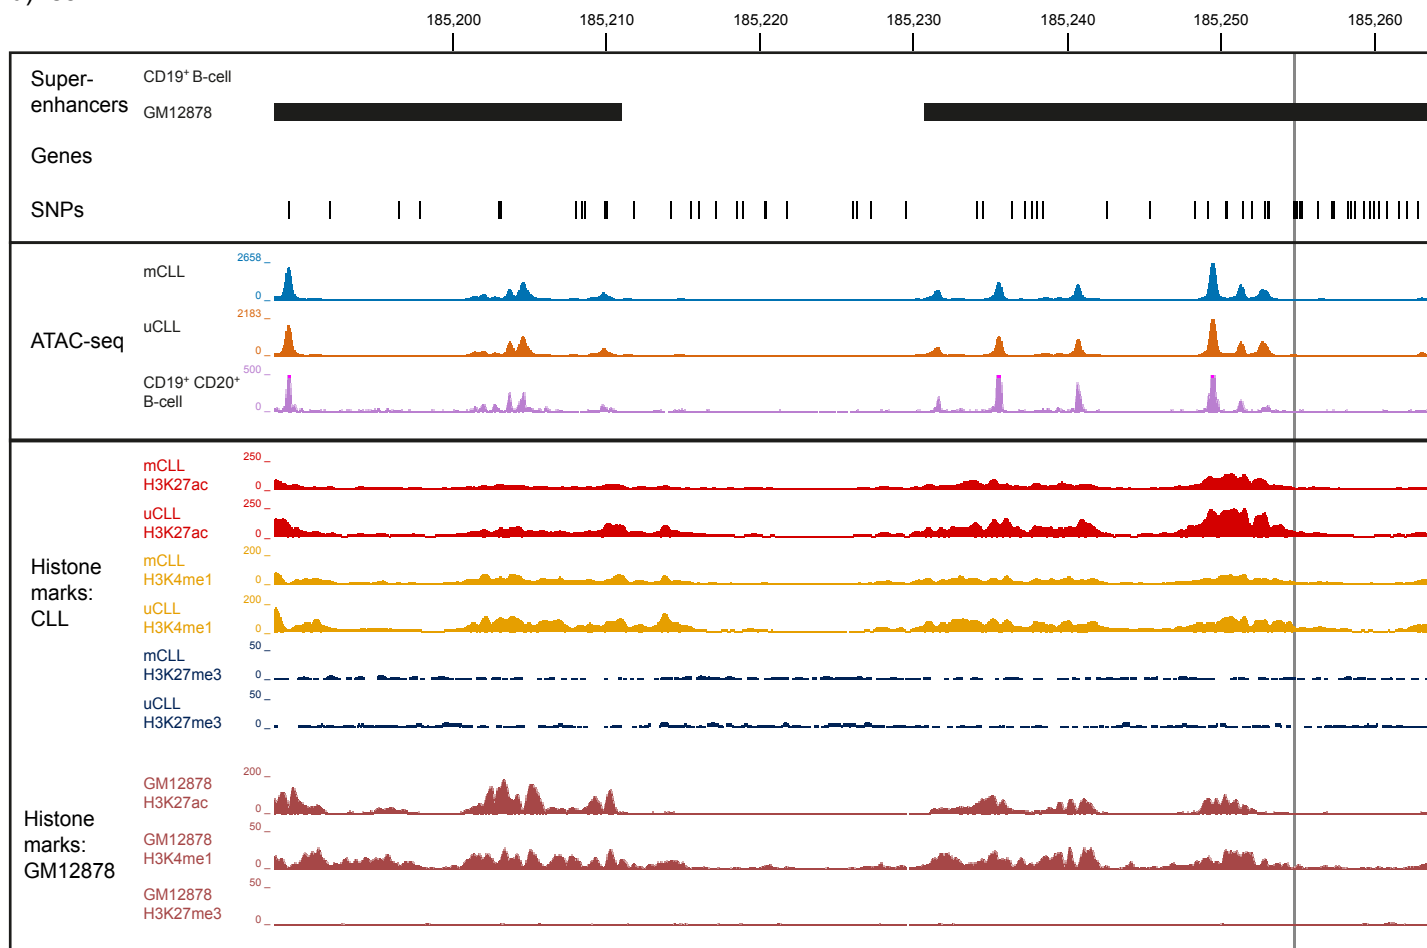

Supplementary Figure 2

e) rs3800461

Chromosome 6 position (kb, hg19)

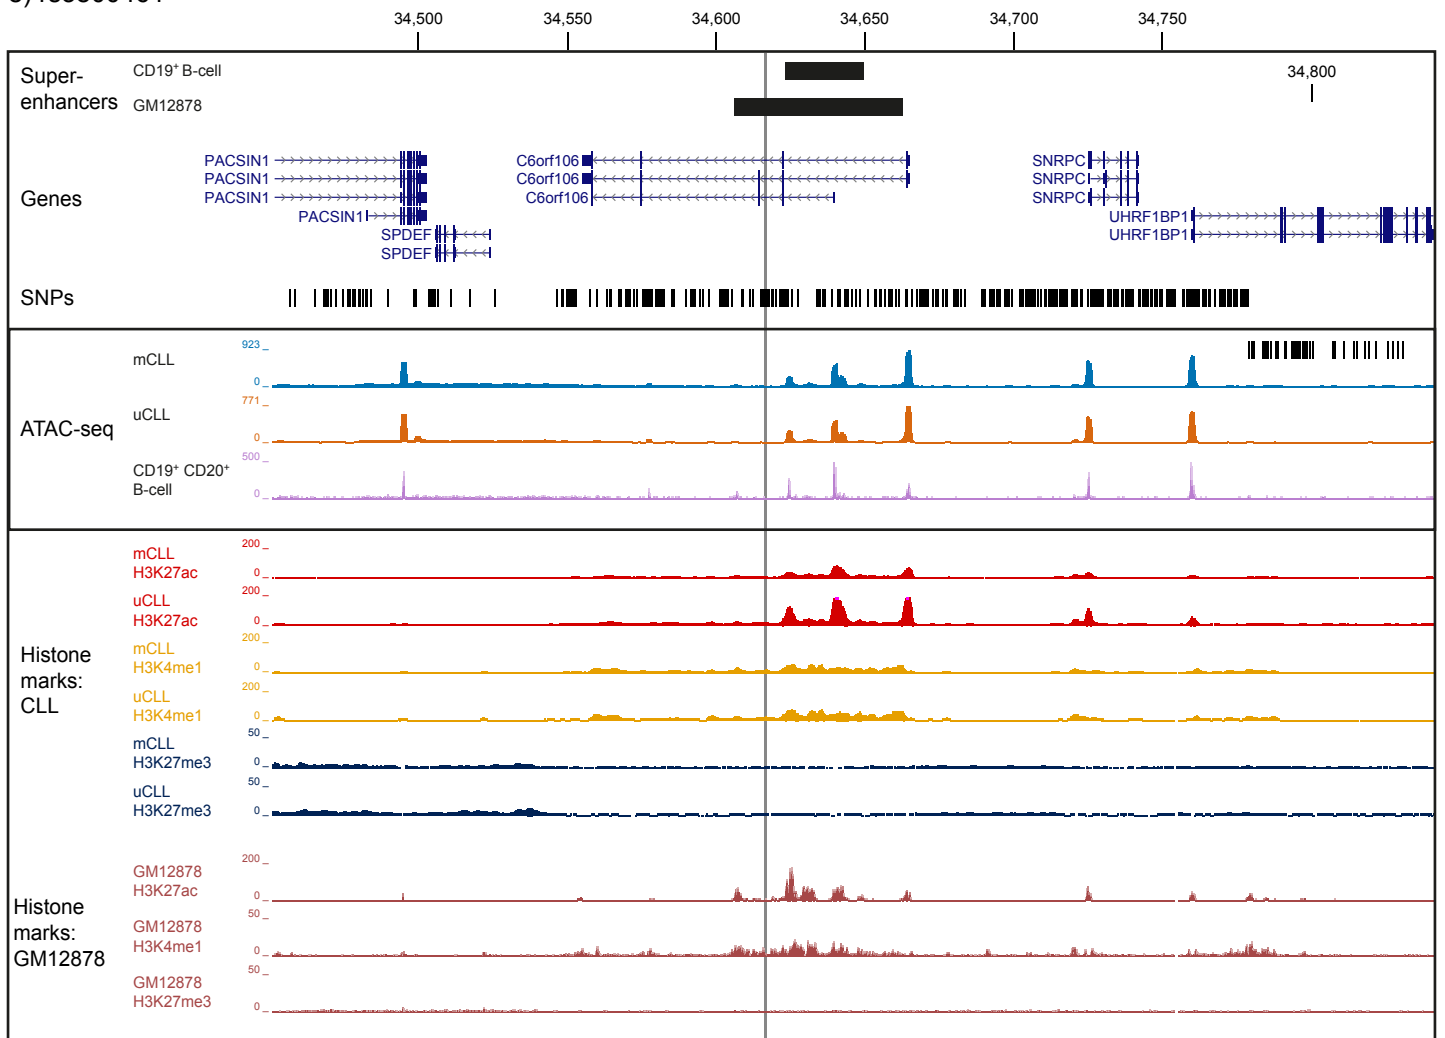

f) rs61904987

Chromosome 11 position (kb, hg19)

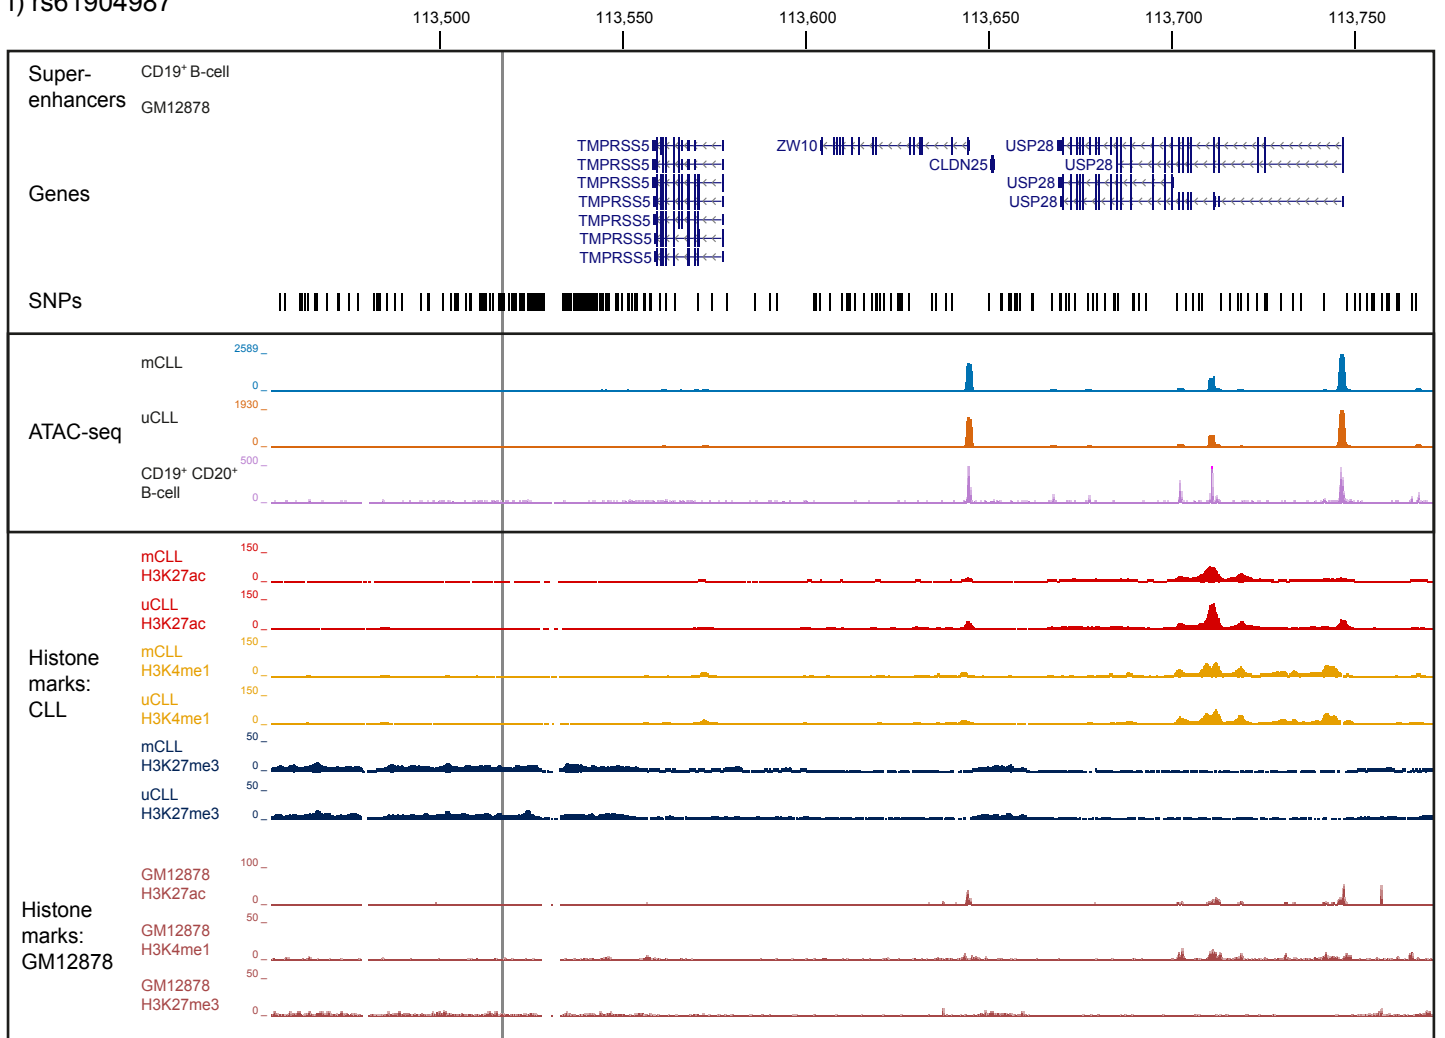

Supplementary Figure 2

g) rs1036935

Chromosome 18 position (kb, hg19)

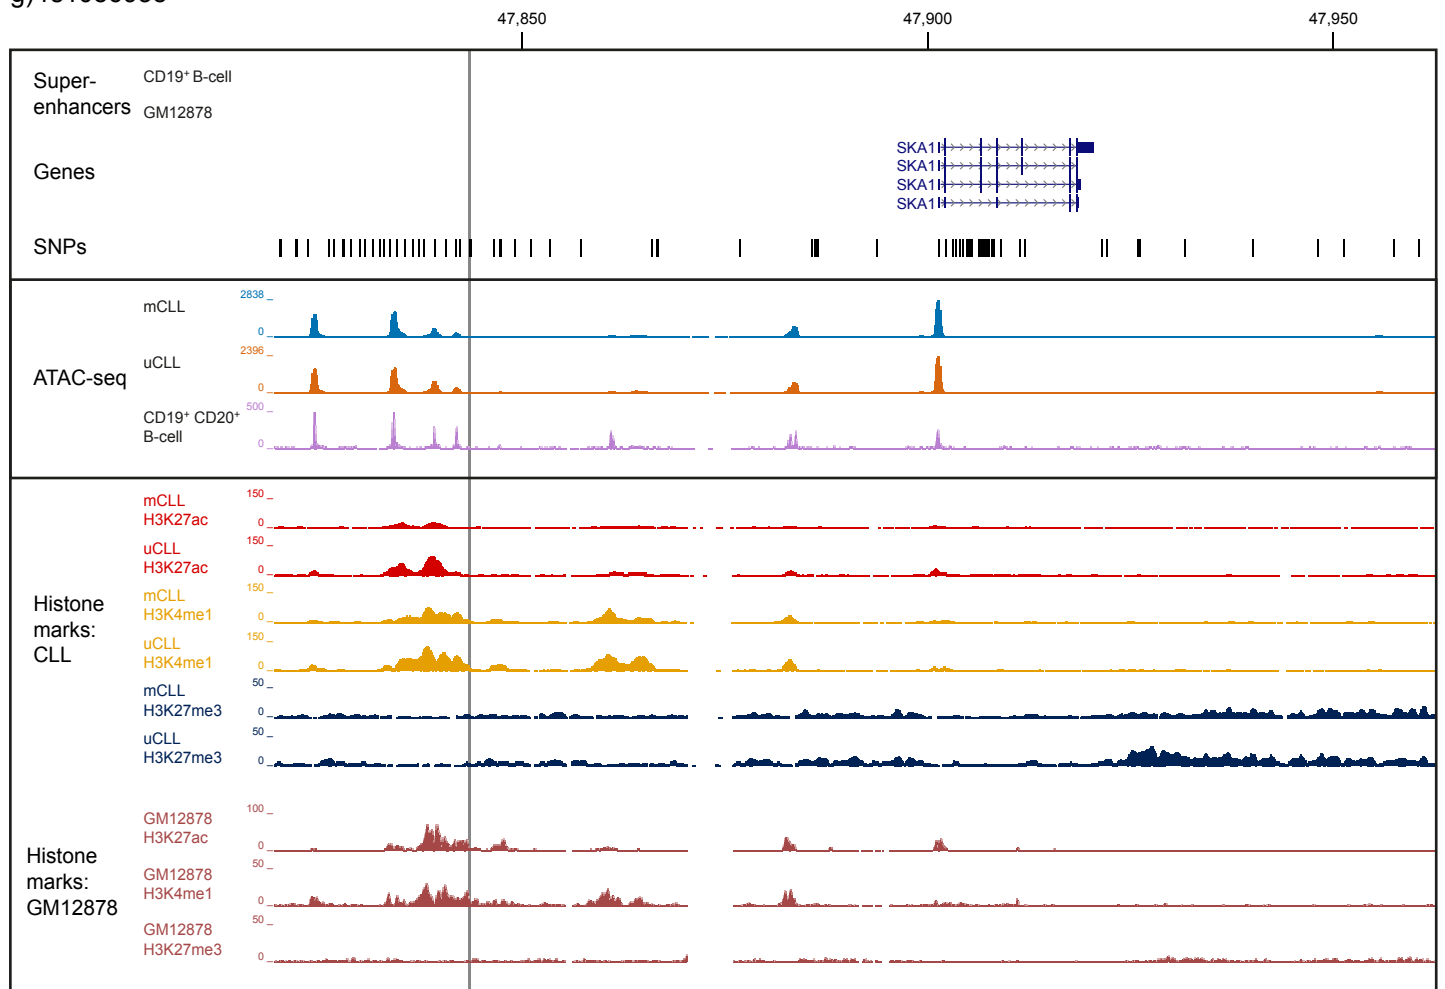

h) rs7254272

Chromosome 19 position (kb, hg19)

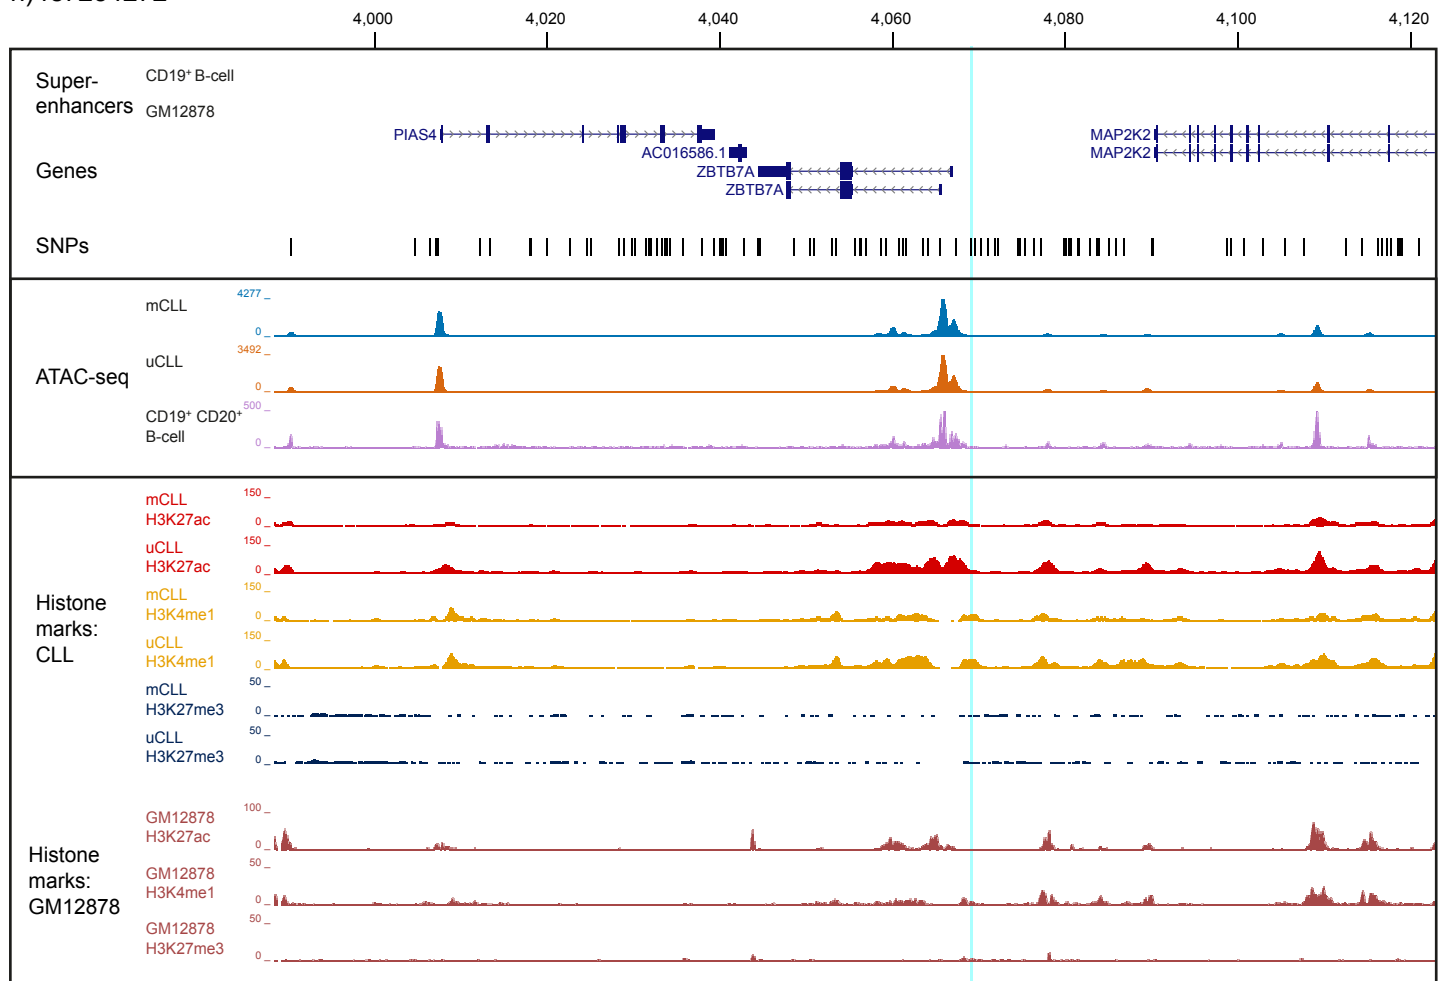

Supplementary Figure 2

i) rs140522

Chromosome 22 position (kb, hg19)

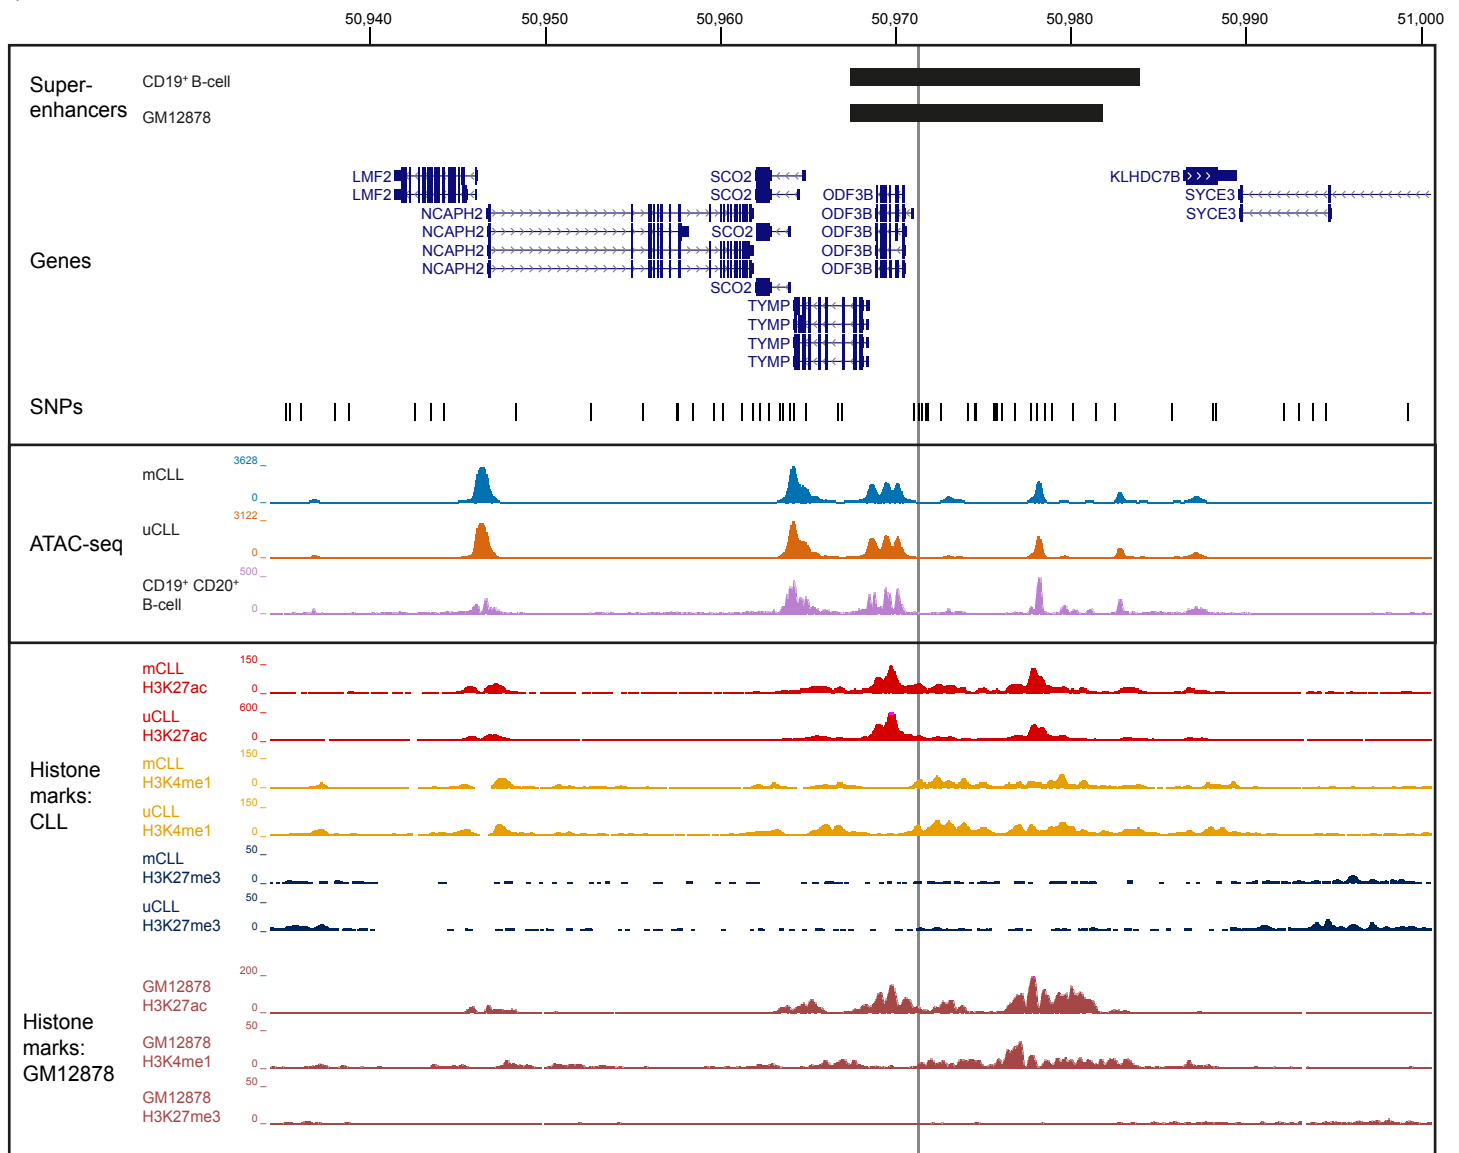

**Supplementary Figure 2: Annotation of the regulatory landscape of the nine novel CLL GWAS loci (a-i).** Plots illustrate available histone mark ChIP-seq and ATAC-seq data from CLL and B-cell lineage cells. The three boxes in each image are arranged from the top as follows: Box 1) super-enhancers in CD19<sup>+</sup> B-cells and lymphoblastoid cell line GM12878 are indicated by black boxes, coding genes from GENCODE v.24 are labelled in blue, all SNPs (marked by short vertical lines) in linkage disequilibrium  $r^2 > 0.2$  with the sentinel SNP (marked by a vertical line); Box 2) ATAC-seq peaks derived from *IGHV* mutated (mCLL, blue), unmutated (uCLL, orange) CLL samples plus normal CD19<sup>+</sup>/CD20<sup>+</sup> B-cells; Box 3) Histone mark data from mCLL and uCLL samples for active chromatin marks H3K27ac (red) and H3K4me1 (yellow) plus repressive chromatin mark H3K27me3 (dark blue). Also shown is the same histone mark data for GM12878.

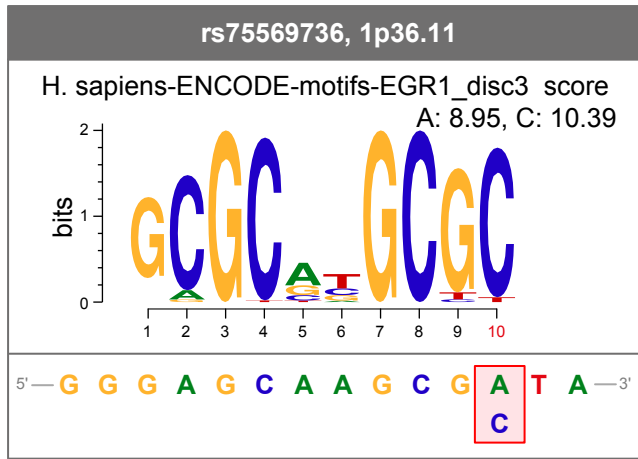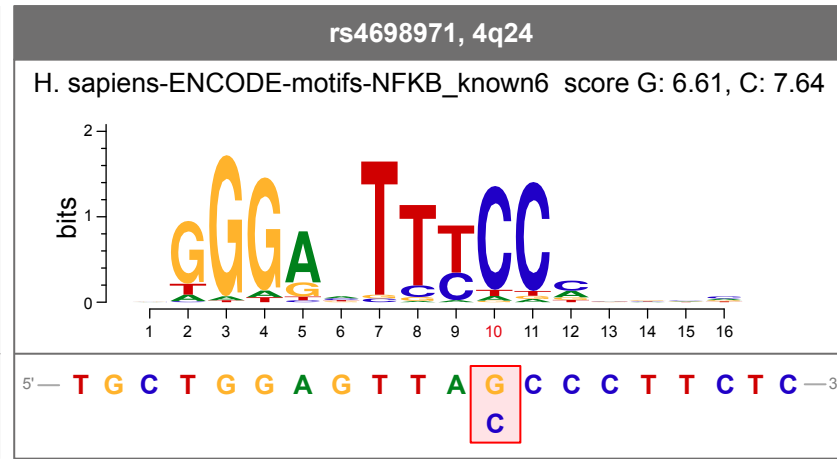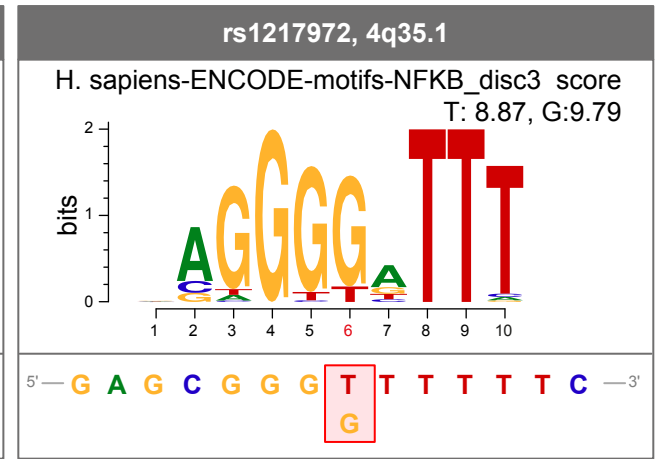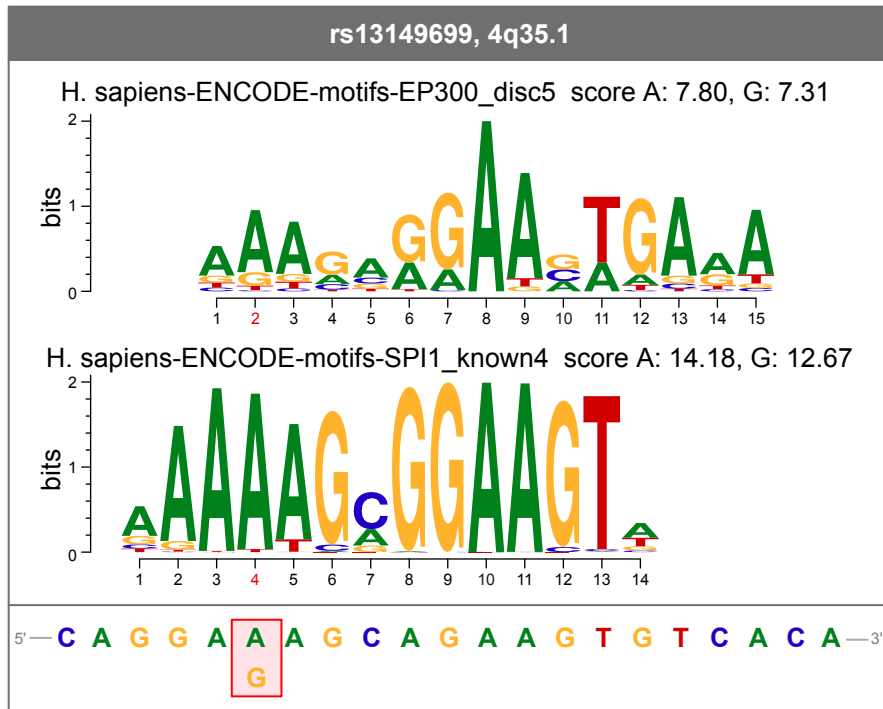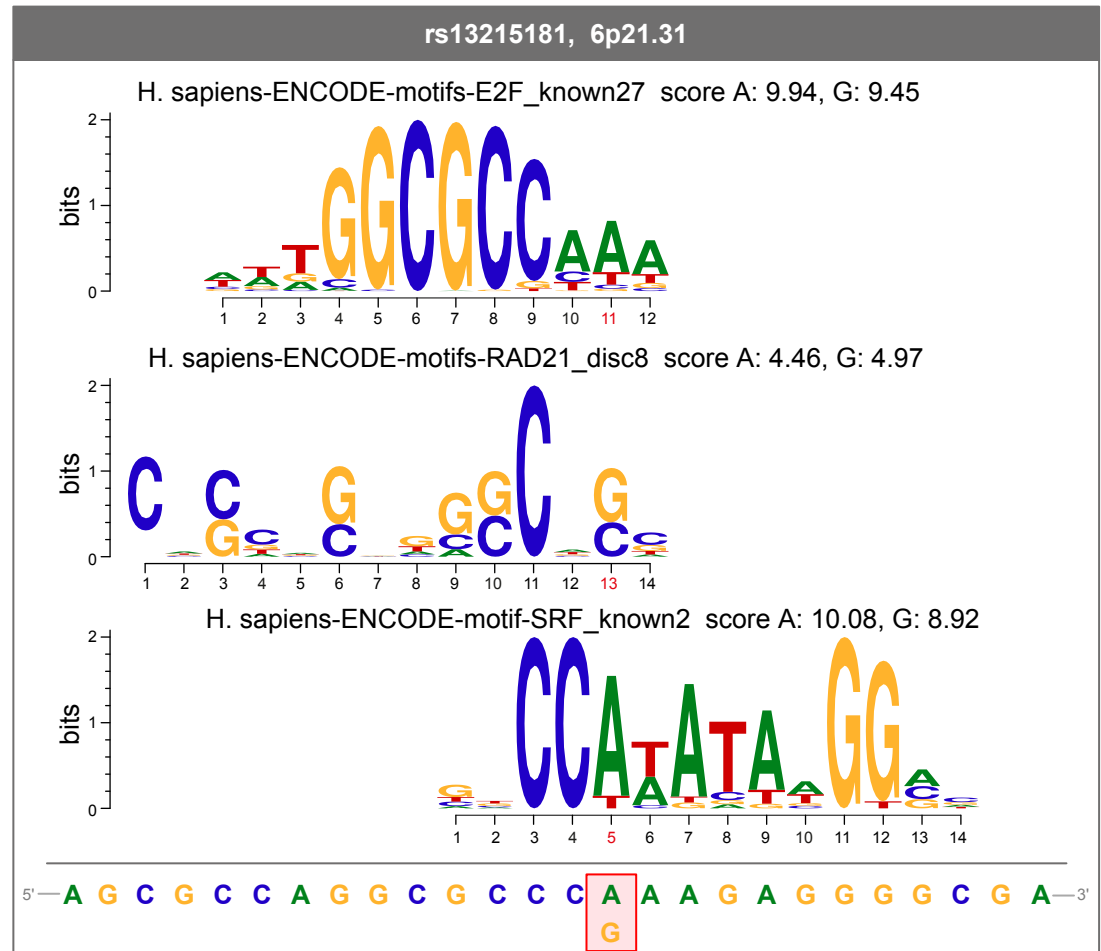

Supplementary Figure 3

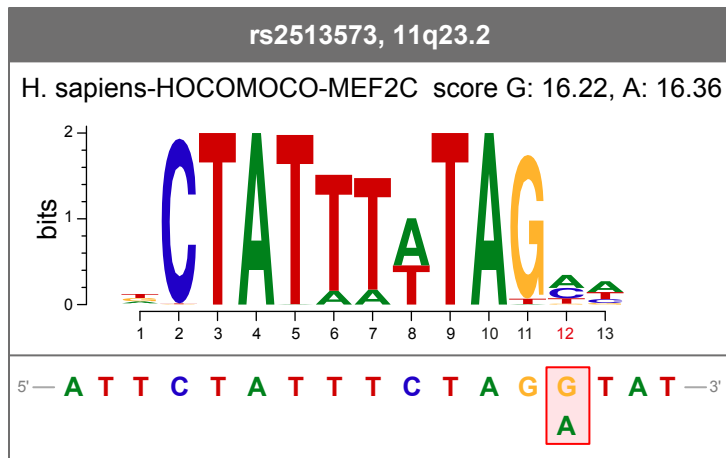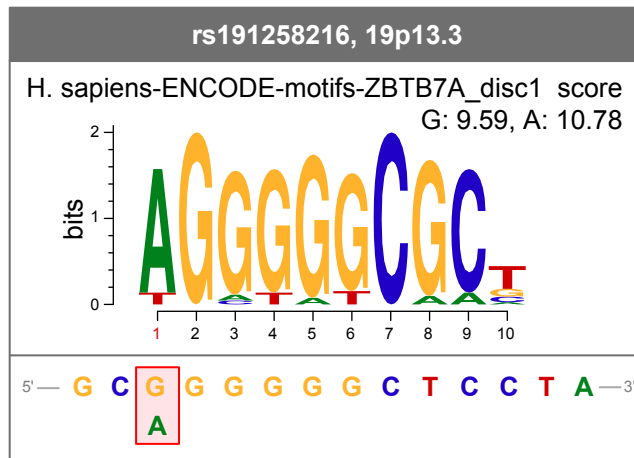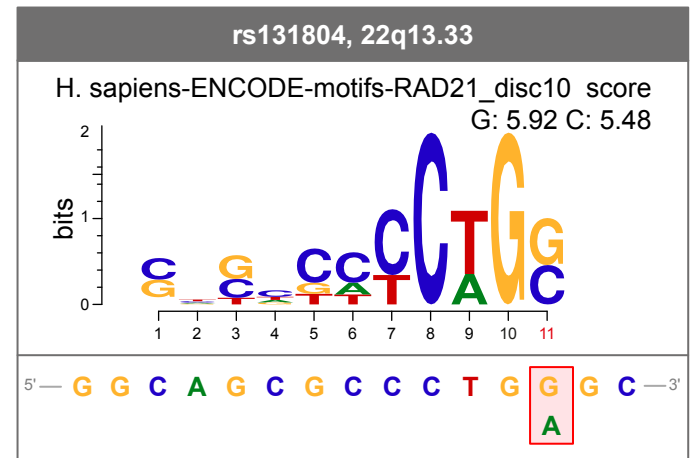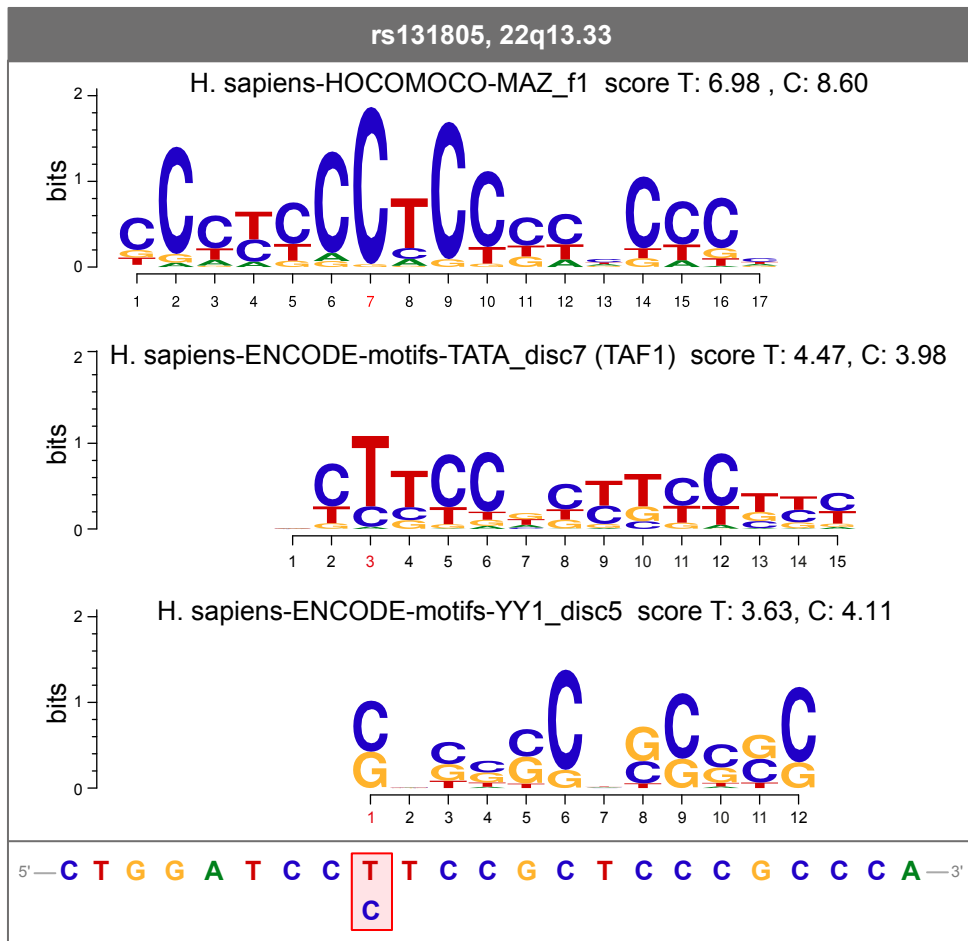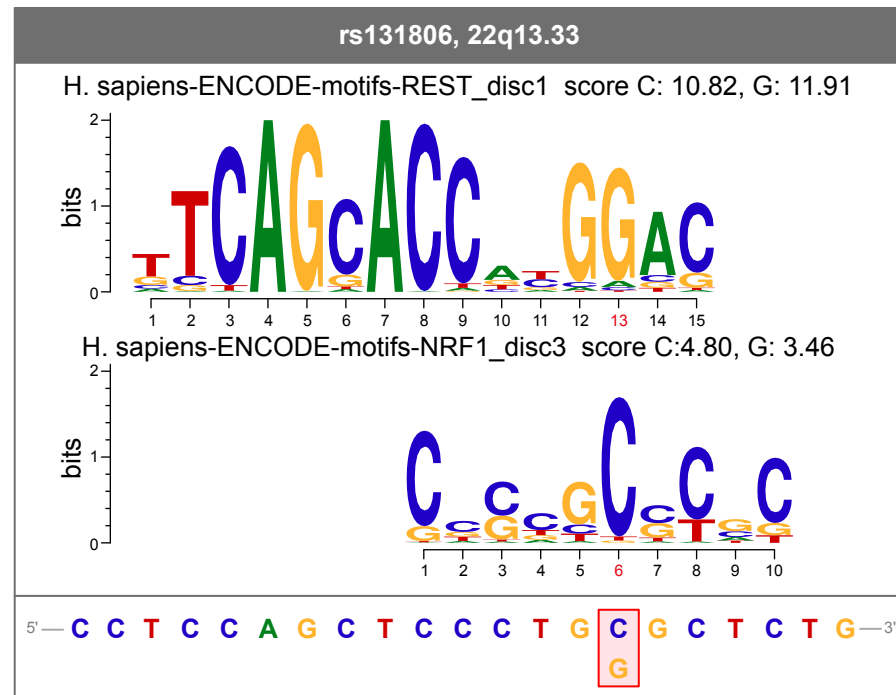

**Supplementary Figure 3: Motifs disrupted by SNPs at novel CLL GWAS loci where corresponding protein is also bound in ENCODE ChIP-seq data.**

Shown are transcription factor binding motifs predicted to be altered by SNPs in LD  $r^2 > 0.2$  with sentinel SNPs at the novel CLL GWAS loci. The transcription factor in question is also bound at the SNP site based on ChIP-seq data from the ENCODE project. Variable nucleotides are highlighted by a pink box. For clarity, where multiple versions of the same motif are disrupted, that with the strongest effect is shown.



**Supplementary Table 1: Details of each GWAS and replication dataset**

| Study                               | Subjects |         | % Male |              | Mean (SD) age |              |
|-------------------------------------|----------|---------|--------|--------------|---------------|--------------|
|                                     | Case     | Control | Case   | Control      | Case          | Control      |
| <b>GWAS</b>                         |          |         |        |              |               |              |
| UK-CLL1                             | 503      | 2698    | 70.6   | <sup>b</sup> | 61.7 (9.9)    | <sup>b</sup> |
| UK-CLL2                             | 1340     | 2501    | 64.0   | <sup>c</sup> | 63.0 (11.2)   | <sup>c</sup> |
| GEC Consortium                      | 387      | 294     | 64.4   | 63.4         | 61 (17.7)     | 64 (10.8)    |
| NHL GWAS Consortium                 |          |         |        |              |               |              |
| ATBC                                | 50       | 236     | 100    | 100          | 72 (6.7)      | 68 (7.7)     |
| CPS-II                              | 251      | 220     | 52.6   | 49.6         | 71 (5.9)      | 68 (6.3)     |
| EPIC                                | 72       | 265     | 54.2   | 45.3         | 63.5 (8.7)    | 63 (8.4)     |
| HPFS                                | 19       | 85      | 100    | 100          | 71 (10)       | 71 (8.5)     |
| MCCS                                | 57       | 75      | 59.7   | 52.0         | 65 (10.9)     | 71 (7.9)     |
| NHS <sup>a</sup>                    | 18       | 88      | 0      | 0            | 64 (10.3)     | 64 (7.0)     |
| NYU-WHS <sup>a</sup>                | 10       | 53      | 0      | 0            | 70.5 (6.9)    | 79 (9.3)     |
| PLCO                                | 278      | 3076    | 56.5   | 95.7         | 70 (6.1)      | 70 (6.2)     |
| BCCA                                | 26       | 109     | 76.9   | 56.0         | 65 (9.2)      | 62 (12.7)    |
| Italian GxE                         | 5        | 45      | 80.0   | 62.2         | 68 (4.9)      | 54 (11.8)    |
| NCI-SEER                            | 86       | 270     | 59.3   | 54.1         | 61.5 (9.6)    | 59 (12.0)    |
| NSW                                 | 13       | 154     | 61.5   | 60.4         | 64 (10.3)     | 58 (11.2)    |
| SCALE                               | 395      | 291     | 66.3   | 57.7         | 63 (8.6)      | 64 (12.1)    |
| UCSF2                               | 22       | 10      | 68.2   | 60.0         | 63 (12.2)     | 44 (15.6)    |
| Yale <sup>a</sup>                   | 39       | 146     | 0      | 0            | 68 (12.0)     | 62 (13.5)    |
| ENGELA                              | 44       | 63      | 65.9   | 65.1         | 62 (9.4)      | 57 (11.4)    |
| EpiLymph                            | 158      | 211     | 65.8   | 54.0         | 64 (11.1)     | 62 (13.0)    |
| Mayo Case-Control                   | 132      | 1167    | 71.2   | 61.2         | 64 (10.6)     | 63 (13.4)    |
| MSKCC                               | 36       | 4       | 58.3   | 0            | 63 (10.8)     | 39 (10.8)    |
| UCSF                                | 213      | 747     | 64.3   | 57.6         | 64 (11.2)     | 62 (13.0)    |
| Utah                                | 324      | 405     | 59.5   | 55.0         | 63 (22.4)     | 64 (16.6)    |
| <b><i>in silico</i> replication</b> |          |         |        |              |               |              |
| ICGC                                | 444      | 609     | 60.8   | 59.3         | 66.0 (12.2)   | 65.6 (14.1)  |
| WHI <sup>a</sup>                    | 226      | 228     | 0      | 0            | NA            | NA           |
| <b><i>de novo</i> replication</b>   |          |         |        |              |               |              |
| ICR                                 | 645      | 2341    | 64.9   | 45.0         | 64.6 (11.4)   | 60.3 (10.0)  |
| Mayo                                | 407      | 1207    | 67.9   | 58.0         | 63 (10.4)     | 63 (12.0)    |

<sup>a</sup> Female only study

<sup>b</sup> UK 1958 Birth Cohort (The Wellcome Trust Case Control Consortium)<sup>1</sup>

<sup>c</sup> UK National Blood Service (The Wellcome Trust Case Control Consortium)<sup>1</sup>

**Supplementary Table 2: Details of the quality control (QC) filters applied to samples and SNPs for each GWAS**

| Study    | Sample QC <sup>a</sup> |                     |                    |                                                                       |                   | Genotyping QC <sup>b</sup> |                          |                    |           |                     |                 |
|----------|------------------------|---------------------|--------------------|-----------------------------------------------------------------------|-------------------|----------------------------|--------------------------|--------------------|-----------|---------------------|-----------------|
|          | Cases pre-QC (N)       | Controls pre-QC (N) | Exclusion criteria |                                                                       | Cases post-QC (N) | Controls post-QC (N)       | Genotyping platform      | Exclusion criteria |           |                     | SNPs passing QC |
|          |                        |                     | Call rate          | Other exclusions                                                      |                   |                            |                          | MAF                | Call rate | HWE- <i>P</i>       |                 |
| UK-CLL1  | 517                    | 2,698               | ≤95%               | 1) Call rate;<br>2) Sex discrepancy;<br>3) relatedness                | 503               | 2,698                      | Illumina HumanCNV370-Duo | <0.01              | ≤95%      | <1x10 <sup>-5</sup> | 301,786         |
| UK-CLL2  | 1,403                  | 2,501               | ≤95%               | 1) Call rate;<br>2) Sex discrepancy;<br>3) relatedness;<br>4) Non-CEU | 1,304             | 2,501                      | Illumina OmniExpress     | <0.01              | ≤95%      | <1x10 <sup>-5</sup> | 630,366         |
| GEC      | 396                    | 296                 | ≤95%               | 1) Non-CEU;<br>2) PCA outliers                                        | 387               | 294                        | Affymetrix 6.0           | <0.01              | ≤95%      | <1x10 <sup>-6</sup> | 687,458         |
| Utah     | 331                    | 420                 | ≤95%               | 1) Abnormal heterozygosity;<br>2) Non-CEU;<br>3) Incomplete phenotype | 324               | 405                        | Illumina HumanHap 610K   | <0.01              | ≤95%      | <1x10 <sup>-6</sup> | 514,816         |
| UCSF     | 214                    | 751                 | ≤95%               | 1) Abnormal heterozygosity;<br>2) PCA outlier                         | 213               | 747                        | Illumina HumanCNV370-Duo | <0.01              | ≤95%      | <1x10 <sup>-6</sup> | 291,232         |
| NHL GWAS | 1,851                  | 6,649               | ≤93%               | 1) High missing rate;<br>2) Sex discrepancy;<br>3) Non-CEU            | 1,711             | 6,568                      | Illumina OmniExpress     | <0.01              | ≤95%      | <1x10 <sup>-6</sup> | 549,934         |

<sup>a</sup> Samples were excluded due to call rate (or failed genotyping), ethnicity (principle components analysis or other samples reported to be not of European descent, CEU), relatedness (any individuals found to be duplicated or related within or between data sets through identity-by-state) or sex discrepancy.

<sup>b</sup> Genotypes were excluded due to minor allele frequency (MAF), SNP call rate and departure from Hardy-Weinberg equilibrium (HWE).

**Supplementary Table 3: Strongest association signals from previously published risk loci discovered in European populations**

| Locus     | Nearest Gene(s)       | Published SNP | Lead SNP in Current GWAS | LD ( $r^2$ ) | Position (hg19, bp) | Risk Allele | Literature OR (95% CI) | Literature <i>P</i> -value | Current GWAS OR (95% CI) | Current GWAS <i>P</i> -value | Ref. |          |                  |
|-----------|-----------------------|---------------|--------------------------|--------------|---------------------|-------------|------------------------|----------------------------|--------------------------|------------------------------|------|----------|------------------|
| 2p22.2    | <i>QPCT, PRKD3</i>    | rs3770745     |                          |              | 37,596,089          | T           | 1.24 (1.15–1.33)       | 1.68E-08                   | 1.16 (1.09-1.23)         | 1.15E-06                     | 2    |          |                  |
|           |                       |               | rs888096                 | 0.22         | 37,603,801          | A           |                        |                            |                          |                              |      | 5.20E-08 |                  |
| 2q13      | <i>ACOXL, BCL2L11</i> | rs13401811    |                          |              | 111,616,104         | G           | 1.41 (1.30–1.52)       | 2.08E-18                   | 1.36 (1.28-1.46)         | 8.70E-20                     | 2    |          |                  |
|           |                       |               | rs1002015                | 0.29         | 111,616,619         | C           |                        |                            |                          |                              |      | 2.23E-23 |                  |
|           |                       |               | rs17483466               |              | 111,797,458         | G           | 1.39 (1.25-1.53)       | 2.36E-10                   | 1.37 (1.29-1.45)         | 2.86E-25                     | 3    |          |                  |
|           |                       |               |                          | rs58055674   | 0.55                | 111,831,793 |                        |                            |                          |                              |      | C        | 2.02E-27         |
|           |                       |               |                          | rs9308731    |                     | 111,908,262 |                        |                            |                          |                              |      | A        | 1.18 (1.12-1.24) |
| rs6708784 | 0.71                  | 111,927,379   | G                        | 2.67E-25     |                     |             |                        |                            |                          |                              |      |          |                  |
| 2q33.1    | <i>CASP10/CASP8</i>   | rs3769825     |                          |              | 202,111,380         | A           | 1.19 (1.12–1.25)       | 2.50E-09                   | 1.16 (1.1-1.21)          | 1.31E-08                     | 2    |          |                  |
|           |                       |               | rs7558911                | 0.51         | 202,023,949         | A           |                        |                            |                          |                              |      | 5.05E-11 |                  |
| 2q37.1    | <i>SP110, SP140</i>   | rs13397985    |                          |              | 231,091,223         | G           | 1.41 (1.26-1.57)       | 5.40E-10                   | 1.43 (1.35-1.52)         | 3.76E-31                     | 3    |          |                  |
|           |                       |               | rs34004493               | 0.59         | 231,154,012         | G           |                        |                            |                          |                              |      | 3.67E-32 |                  |
| 2q37.3    | <i>FARP2</i>          | rs757978      |                          |              | 242,371,101         | T           | 1.39 (1.25-1.56)       | 2.11E-09                   | 1.29 (1.2-1.39)          | 5.80E-11                     | 4    |          |                  |
|           |                       |               | rs3755397                | 0.64         | 242,294,913         | G           |                        |                            |                          |                              |      | 9.48E-12 |                  |
| 3p24.1    | <i>EOMES</i>          | rs9880772     | rs9880772                |              | 27,777,779          | A           | 1.18 (1.13-1.25)       | 9.32E-11                   | 1.16 (1.11-1.22)         | 1.91E-09                     | 5    |          |                  |
| 3q26.2    | <i>MYNN, TERC</i>     | rs10936599    |                          |              | 169,492,101         | C           | 1.26 (1.17-1.35)       | 1.74E-09                   | 1.19 (1.12-1.26)         | 6.56E-09                     | 6    |          |                  |
|           |                       |               | rs1317082                | 1.00         | 169,497,585         | A           |                        |                            |                          |                              |      | 5.77E-09 |                  |
| 3q28      | <i>LPP</i>            | rs9815073     |                          |              | 188,115,682         | C           | 1.18 (1.11-1.25)       | 2.28E-08                   | 1.12 (1.06-1.18)         | 6.75E-05                     | 5    |          |                  |
|           |                       |               | rs73192661               | 0.69         | 188,128,794         | C           |                        |                            |                          |                              |      | 1.73E-06 |                  |
| 4q25      | <i>LEF1</i>           | rs898518      |                          |              | 109,016,824         | A           | 1.20 (1.14–1.27)       | 4.24E-10                   | 1.16 (1.1-1.22)          | 1.02E-08                     | 2    |          |                  |
|           |                       |               | rs7690934                | 0.97         | 109,025,865         | C           |                        |                            |                          |                              |      | 6.08E-09 |                  |
| 4q26      | <i>CAMK2D</i>         | rs6858698     |                          |              | 114,683,844         | C           | 1.31 (1.20-1.44)       | 3.07E-09                   | 1.08 (1.01-1.16)         | 2.87E-02                     | 6    |          |                  |
|           |                       |               | rs1476569                | 0.39         | 114,698,696         | G           |                        |                            |                          |                              |      | 4.51E-06 |                  |
| 5p15.33   | <i>TERT</i>           | rs10069690    |                          |              | 1,279,790           | T           | 1.20 (1.13-1.26)       | 1.12E-10                   | 1.19 (1.13-1.26)         | 1.45E-09                     | 6    |          |                  |
|           |                       |               | rs7705526                | 0.27         | 1,285,974           | A           |                        |                            |                          |                              |      | 5.90E-10 |                  |

| Locus    | Nearest Gene(s)          | Published SNP        | Lead SNP in Current GWAS | LD ( $r^2$ ) | Position (hg19, bp) | Risk Allele | Literature OR (95% CI) | Literature <i>P</i> -value | Current GWAS OR (95% CI) | Current GWAS <i>P</i> -value | Ref. |
|----------|--------------------------|----------------------|--------------------------|--------------|---------------------|-------------|------------------------|----------------------------|--------------------------|------------------------------|------|
| 5p15.33  | <i>CLPTM1L</i>           | rs31490 <sup>b</sup> |                          |              | 1,344,458           | A           | 1.18 (1.11-1.26)       | 1.72E-07                   | 1.09 (1.03-1.14)         | 1.18E-03                     | 6    |
|          |                          |                      | rs10073340               | 0.25         | 1,321,873           | T           |                        |                            | 1.13 (1.06-1.20)         | 2.84E-04                     |      |
| 6p25.3   | <i>IRF4</i>              | rs872071             |                          |              | 411,064             | G           | 1.54 (1.41-1.69)       | 1.91E-20                   | 1.25 (1.19-1.32)         | 4.22E-19                     | 3    |
|          |                          |                      | rs9392504                | 0.81         | 412,802             | A           |                        |                            | 1.33 (1.26-1.4)          | 9.81E-29                     |      |
| 6p25.2   | <i>SERPINB6</i>          | rs73718779           | rs73718779               | -            | 2,969,278           | T           | 1.26 (1.16-1.37)       | 1.21E-08                   | 1.14 (1.06-1.23)         | 6.98E-04                     | 5    |
| 6p21.32  | <i>HLA</i>               | rs674313             |                          |              | 32,578,082          | T           | 1.69 (1.41-2.01)       | 6.92E-09                   | 1.18 (1.12-1.25)         | 5.74E-09                     | 8    |
|          |                          |                      | rs9271176                | 0.09         | 32,578,127          | G           |                        |                            | 1.29 (1.22-1.36)         | 3.16E-20                     |      |
| 6p21.31  | <i>BAK1</i>              | rs210134             |                          |              | 33,540,209          | G           | 1.37 (1.22-1.53)       | 1.03E-12                   | 1.23 (1.17-1.3)          | 6.48E-14                     | 7    |
|          |                          |                      | rs210143                 | 0.82         | 33,546,930          | C           |                        |                            | 1.26 (1.19-1.33)         | 5.77E-16                     |      |
| 6q25.2   | <i>IPCEF1</i>            | rs2236256            |                          |              | 154,478,440         | C           | 1.23 (1.15-1.30)       | 1.50E-10                   | 1.14 (1.09-1.2)          | 1.67E-07                     | 6    |
|          |                          |                      | rs4869818                | 0.97         | 154,471,225         | G           |                        |                            | 1.15 (1.09-1.21)         | 4.11E-08                     |      |
| 7q31.33  | <i>POT1</i>              | rs17246404           |                          |              | 124,462,661         | C           | 1.22 (1.14-1.31)       | 3.40E-08                   | 1.15 (1.09-1.22)         | 5.15E-07                     | 6    |
|          |                          |                      | rs2267708                | 0.25         | 124,392,512         | T           |                        |                            | 1.16 (1.1-1.22)          | 8.55E-09                     |      |
| 8q22.3   | <i>ODF1</i>              | rs2511714            |                          |              | 103,578,874         | G           | 1.16 (1.11-1.22)       | 2.90E-09                   | 1.14 (1.08-1.2)          | 4.33E-07                     | 6    |
|          |                          |                      | rs2511713                | 0.52         | 103,577,865         | G           |                        |                            | 1.17 (1.1-1.23)          | 6.04E-08                     |      |
| 8q24.21  | <i>POU5F1B</i>           | rs2456449            |                          |              | 128,192,981         | G           | 1.26 (1.17-1.35)       | 7.84E-10                   | 1.23 (1.17-1.29)         | 5.76E-15                     | 4    |
|          |                          |                      | rs2466029                | 0.76         | 128,200,971         | G           |                        |                            | 1.23 (1.17-1.3)          | 7.47E-16                     |      |
| 9p21.3   | <i>CDKN2B-AS1</i>        | rs1679013            |                          |              | 22,206,987          | C           | 1.20 (1.14-1.27)       | 4.24E-10                   | 1.16 (1.1-1.22)          | 2.17E-08                     | 2    |
| 10q23.31 | <i>ACTA, FAS</i>         | rs4406737            |                          |              | 90,759,724          | G           | 1.27 (1.19-1.33)       | 1.22E-14                   | 1.22 (1.16-1.29)         | 7.20E-15                     | 2    |
|          |                          |                      | rs6586163                | 0            | 90,752,018          | A           |                        |                            | 1.23 (1.17-1.29)         | 1.14E-15                     |      |
| 11p15.5  | <i>C11orf21, TSPAN32</i> | rs7944004            |                          |              | 2,311,152           | T           | 1.20 (1.13-1.27)       | 2.15E-10                   | 1.09 (1.04-1.15)         | 4.62E-04                     | 2    |
|          |                          |                      | rs2651823                | 0.51         | 2,321,650           | A           |                        |                            | 1.18 (1.13-1.25)         | 5.24E-11                     |      |
| 11q24.1  | <i>SCN3B, GRAMD1B</i>    | rs735665             |                          |              | 123,361,397         | A           | 1.45 (1.31-1.61)       | 3.78E-12                   | 1.63 (1.53-1.72)         | 4.37E-58                     | 3    |
|          |                          |                      | rs35923643               | 1.00         | 123,355,391         | G           |                        |                            | 1.63 (1.53-1.72)         | 4.26E-58                     |      |
| 12q24.13 | <i>OAS3</i>              | rs10735079           |                          |              | 113,380,008         | G           | 1.18 (1.12-1.26)       | 2.34E-08                   | 1.15 (1.09-1.21)         | 1.05E-07                     | 9    |
|          |                          |                      | rs6489882                | 1.00         | 113,381,376         | G           |                        |                            | 1.16 (1.1-1.22)          | 4.76E-08                     |      |
| 15q15.1  | <i>BMF, BUB1B</i>        | rs8024033            | rs8024033                | -            | 40,403,657          | C           | 1.22 (1.15-1.30)       | 2.71E-10                   | 1.26 (1.2-1.32)          | 7.13E-19                     | 2    |

| Locus    | Nearest Gene(s)     | Published SNP         | Lead SNP in Current GWAS | LD ( $r^2$ ) | Position (hg19, bp) | Risk Allele | Literature OR (95% CI) | Literature <i>P</i> -value | Current GWAS OR (95% CI) | Current GWAS <i>P</i> -value | Ref. |                  |          |                  |          |   |
|----------|---------------------|-----------------------|--------------------------|--------------|---------------------|-------------|------------------------|----------------------------|--------------------------|------------------------------|------|------------------|----------|------------------|----------|---|
| 15q21.3  | <i>RFX7, NEDD4</i>  | rs7169431             |                          |              | 56,340,896          | A           | 1.36 (1.21-1.53)       | 4.74E-07                   | 1.32 (1.21-1.44)         | 3.92E-10                     | 4    |                  |          |                  |          |   |
|          |                     |                       | rs142215530              | 0.17         | 56,777,691          | G           |                        |                            |                          |                              |      | 1.39 (1.29-1.5)  | 2.46E-18 |                  |          |   |
| 15q23    | <i>RPLP1</i>        | rs7176508             |                          |              | 70,018,990          | A           | 1.37 (1.26-1.50)       | 4.54E-12                   | 1.35 (1.28-1.42)         | 4.55E-31                     | 3    |                  |          |                  |          |   |
|          |                     |                       | rs11637565               | 0.96         | 70,020,525          | G           |                        |                            |                          |                              |      | 1.35 (1.28-1.42) | 1.96E-31 |                  |          |   |
| 15q25.2  | <i>CPEB1</i>        | rs783540 <sup>b</sup> |                          |              | 83,254,708          | G           | 1.18 (1.10-1.27)       | 3.67E-06                   | 1.09 (1.04-1.15)         | 8.83E-04                     | 4    |                  |          |                  |          |   |
|          |                     |                       | rs17356118               |              | 83,237,899          | A           |                        |                            |                          |                              |      | 1.12 (1.05-1.19) | 2.48E-04 |                  |          |   |
| 16q24.1  | <i>IRF8</i>         | rs305061 <sup>b</sup> |                          |              | 85,975,659          | T           | 1.22 (1.12-1.32)       | 3.60E-07                   | 1.14 (1.08-1.2)          | 1.29E-06                     | 4    |                  |          |                  |          |   |
|          |                     |                       | rs305065                 |              | 85,973,866          | C           |                        |                            |                          |                              |      | 1.16 (1.1-1.22)  | 7.57E-08 |                  |          |   |
|          |                     |                       | rs391525                 |              | 85,944,439          | G           |                        |                            |                          |                              |      | 1.81 (1.52-2.18) | 6.94E-11 | 1.33 (1.26-1.41) | 1.07E-25 | 8 |
|          |                     |                       | rs391855                 | 0.62         | 85,928,621          | A           |                        |                            |                          |                              |      | 1.34 (1.27-1.41) | 1.25E-28 |                  |          |   |
| 18q21.32 | <i>PMAIP1</i>       | rs4368253             | rs4368253                | -            | 57,622,287          | C           | 1.19 (1.12-1.27)       | 2.51E-08                   | 1.17 (1.11-1.24)         | 1.26E-08                     | 2    |                  |          |                  |          |   |
| 18q21.33 | <i>BCL2</i>         | rs4987855             |                          |              | 60,793,549          | C           | 1.47 (1.32-1.61)       | 2.66E-12                   | 1.36 (1.24-1.49)         | 3.99E-11                     | 2    |                  |          |                  |          |   |
|          |                     |                       | rs77551289               | 0.88         | 60,788,745          | A           |                        |                            |                          |                              |      | 1.37 (1.25-1.5)  | 1.83E-11 |                  |          |   |
|          |                     |                       | rs4987852                | -            | 60,793,921          | C           |                        |                            |                          |                              |      | 1.41 (1.27-1.56) | 7.76E-11 | 1.32 (1.2-1.44)  | 4.66E-09 |   |
| 19q13.3  | <i>PRKD2, STRN4</i> | rs11083846            |                          |              | 47,207,654          | A           | 1.35 (1.22-1.49)       | 3.96E-09                   | 1.24 (1.15-1.34)         | 2.14E-06                     | 3    |                  |          |                  |          |   |
|          |                     |                       | rs874460                 | 0.05         | 47,176,752          | C           |                        |                            |                          |                              |      | 1.24 (1.15-1.34) | 3.37E-08 |                  |          |   |

<sup>a</sup> Lowest *P*-value variant within a 500kb window in the imputation

<sup>b</sup> Associations that did not reach genome-wide significance in original or current study

**Supplementary Table 4: Summary statistics from all datasets for SNPs taken forward to replication phase, and achieved genome-wide significance**

|                     |                     | SNP        |             |             |             |            |             |            |                        |            |
|---------------------|---------------------|------------|-------------|-------------|-------------|------------|-------------|------------|------------------------|------------|
|                     |                     | rs34676223 | rs41271473  | rs71597109  | rs57214277  | rs3800461  | rs61904987  | rs1036935  | rs7254272 <sup>a</sup> | rs140522   |
|                     | Locus               | 1p36.11    | 1q42.13     | 4q24        | 4q35.1      | 6p21.31    | 11q23.2     | 18q21.1    | 19p13.3                | 22q13.33   |
|                     | Position (bp, hg19) | 23,943,735 | 228,880,296 | 102,741,002 | 185,254,772 | 34,616,322 | 113,517,203 | 47,843,534 | 4,069,119              | 50,971,266 |
|                     | Risk allele         | C          | G           | C           | T           | C          | T           | A          | A                      | T          |
| Study               | Other allele        | A          | A           | T           | C           | G          | C           | G          | G                      | C          |
| UK-CLL1             | Case RAF            | 0.72       | 0.82        | 0.70        | 0.45        | 0.13       | 0.16        | 0.27       | 0.17                   | 0.37       |
|                     | Control RAF         | 0.71       | 0.78        | 0.68        | 0.41        | 0.12       | 0.14        | 0.22       | 0.17                   | 0.33       |
|                     | OR                  | 1.06       | 1.29        | 1.12        | 1.16        | 1.18       | 1.20        | 1.30       | 1.03                   | 1.17       |
|                     | <i>P</i> -value     | 0.4868     | 0.0020      | 0.1331      | 0.03        | 0.1351     | 0.0622      | 0.0013     | 0.7790                 | 0.0251     |
| UK-CLL2             | Case RAF            | 0.74       | 0.82        | 0.72        | 0.43        | 0.15       | 0.16        | 0.24       | 0.21                   | 0.36       |
|                     | Control RAF         | 0.70       | 0.79        | 0.68        | 0.41        | 0.12       | 0.13        | 0.22       | 0.17                   | 0.32       |
|                     | OR                  | 1.20       | 1.23        | 1.21        | 1.07        | 1.31       | 1.24        | 1.15       | 1.28                   | 1.19       |
|                     | <i>P</i> -value     | 0.0006     | 0.0008      | 0.0002      | 0.14        | 0.0001     | 0.0015      | 0.0167     | 0.0001                 | 0.0005     |
| GEC Consortium      | Case RAF            | 0.75       | 0.80        | 0.72        | 0.46        | 0.13       | 0.13        | 0.26       | 0.20                   | 0.36       |
|                     | Control RAF         | 0.71       | 0.78        | 0.72        | 0.40        | 0.11       | 0.11        | 0.21       | 0.20                   | 0.31       |
|                     | OR                  | 1.27       | 1.17        | 1.00        | 1.30        | 1.29       | 1.20        | 1.36       | 1.00 <sup>a</sup>      | 1.22       |
|                     | <i>P</i> -value     | 0.1        | 0.3         | 1.0         | 0.03        | 0.2        | 0.3         | 0.031      | 1.0                    | 0.1        |
| NHL GWAS Consortium | Case RAF            | 0.73       | 0.81        | 0.73        | 0.45        | 0.14       | 0.13        | 0.24       | 0.20                   | 0.36       |
|                     | Control RAF         | 0.70       | 0.79        | 0.69        | 0.41        | 0.12       | 0.11        | 0.22       | 0.18                   | 0.33       |
|                     | OR                  | 1.15       | 1.16        | 1.20        | 1.15        | 1.15       | 1.24        | 1.11       | 1.17                   | 1.14       |
|                     | <i>P</i> -value     | 0.0015     | 0.0030      | 0.00002     | 0.0003      | 0.0134     | 0.0003      | 0.0266     | 0.0016                 | 0.0016     |
| UCSF                | Case RAF            | 0.75       | 0.82        | 0.70        | 0.42        | 0.12       | 0.12        | 0.25       | 0.20                   | 0.35       |
|                     | Control RAF         | 0.70       | 0.81        | 0.69        | 0.41        | 0.12       | 0.11        | 0.21       | 0.18                   | 0.31       |
|                     | OR                  | 1.31       | 1.11        | 1.07        | 1.02        | 1.01       | 1.17        | 1.33       | 1.11                   | 1.20       |
|                     | <i>P</i> -value     | 0.0315     | 0.4676      | 0.5954      | 0.8409      | 0.9329     | 0.3461      | 0.0262     | 0.4537                 | 0.1120     |

|                                  |                                                      |                     |                     |                     |                     |                     |                     |                     |                     |                     |
|----------------------------------|------------------------------------------------------|---------------------|---------------------|---------------------|---------------------|---------------------|---------------------|---------------------|---------------------|---------------------|
| Utah                             | Case RAF                                             | 0.75                | 0.81                | 0.72                | 0.44                | 0.13                | 0.14                | 0.23                | 0.21                | 0.33                |
|                                  | Control RAF                                          | 0.74                | 0.80                | 0.69                | 0.40                | 0.09                | 0.12                | 0.21                | 0.16                | 0.32                |
|                                  | OR                                                   | 1.05                | 1.10                | 1.17                | 1.24                | 1.51                | 1.22                | 1.15                | 1.35                | 1.07                |
|                                  | <i>P</i> -value                                      | 0.6969              | 0.4670              | 0.1769              | 0.0459              | 0.0141              | 0.1960              | 0.2840              | 0.0296              | 0.5481              |
| <b>Meta prior to replication</b> | <b>OR</b>                                            | <b>1.16</b>         | <b>1.19</b>         | <b>1.17</b>         | <b>1.14</b>         | <b>1.21</b>         | <b>1.23</b>         | <b>1.17</b>         | <b>1.18</b>         | <b>1.16</b>         |
|                                  | <b>95% CI</b>                                        | <b>(1.09;1.22)</b>  | <b>(1.12;1.26)</b>  | <b>(1.11;1.24)</b>  | <b>(1.08;1.19)</b>  | <b>(1.12;1.31)</b>  | <b>(1.14;1.32)</b>  | <b>(1.10;1.24)</b>  | <b>(1.11;1.26)</b>  | <b>(1.10;1.22)</b>  |
|                                  | <b><i>P</i>-value</b>                                | <b>2.69E-07</b>     | <b>4.69E-08</b>     | <b>1.02E-08</b>     | <b>9.56E-07</b>     | <b>4.20E-07</b>     | <b>4.44E-08</b>     | <b>2.81E-07</b>     | <b>4.61E-07</b>     | <b>2.20E-08</b>     |
| ICR replication                  | Case RAF                                             | 0.76                | 0.82                | 0.71                | 0.42                | 0.13                | 0.17                | 0.24                | 0.19                | 0.35                |
|                                  | Control RAF                                          | 0.70                | 0.79                | 0.69                | 0.42                | 0.12                | 0.13                | 0.22                | 0.16                | 0.32                |
|                                  | OR                                                   | 1.30                | 1.18                | 1.12                | 1.02                | 1.12                | 1.38                | 1.17                | 1.16                | 1.14                |
|                                  | <i>P</i> -value                                      | 0.0003              | 0.0426              | 0.1080              | 0.7165              | 0.2321              | 0.0002              | 0.0340              | 0.0696              | 0.0433              |
| ICGC replication                 | Case RAF                                             | 0.71                | 0.84                | 0.76                | 0.41                | 0.10                | 0.11                | 0.25                | 0.21                | 0.31                |
|                                  | Control RAF                                          | 0.63                | 0.80                | 0.73                | 0.36                | 0.09                | 0.10                | 0.24                | 0.20                | 0.30                |
|                                  | OR                                                   | 1.47                | 1.30                | 1.23                | 1.24                | 1.22                | 1.16                | 1.08                | 1.08                | 1.08                |
|                                  | <i>P</i> -value                                      | 0.0001              | 0.02                | 0.05                | 0.0214              | 0.21                | 0.31                | 0.47                | 0.53                | 0.42                |
| Mayo replication                 | Case RAF                                             | 0.73                | 0.81                | 0.73                | 0.43                | 0.14                | 0.13                | 0.23                | 0.19                | 0.36                |
|                                  | Control RAF                                          | 0.70                | 0.78                | 0.70                | 0.40                | 0.11                | 0.11                | 0.22                | 0.17                | 0.34                |
|                                  | OR                                                   | 1.20                | 1.22                | 1.20                | 1.14                | 1.29                | 1.27                | 1.08                | 1.17                | 1.08                |
|                                  | <i>P</i> -value                                      | 0.0464              | 0.0514              | 0.0490              | 0.1169              | 0.0417              | 0.0524              | 0.4360              | 0.1226              | 0.3466              |
| WHI replication                  | Case RAF                                             | 0.74                | 0.80                | 0.71                | 0.45                | 0.12                | 0.12                | 0.23                | 0.18                | 0.37                |
|                                  | Control RAF                                          | 0.74                | 0.80                | 0.72                | 0.40                | 0.11                | 0.13                | 0.22                | 0.18                | 0.36                |
|                                  | OR                                                   | 1.09                | 1.03                | 0.95                | 1.26                | 1.05                | 0.83                | 1.04                | 0.94                | 1.03                |
|                                  | <i>P</i> -value                                      | 0.6236              | 0.8853              | 0.7724              | 0.1341              | 0.8352              | 0.4112              | 0.8415              | 0.7379              | 0.8696              |
| <b>Meta post replication</b>     | <b>OR</b>                                            | <b>1.19</b>         | <b>1.19</b>         | <b>1.17</b>         | <b>1.13</b>         | <b>1.20</b>         | <b>1.24</b>         | <b>1.15</b>         | <b>1.17</b>         | <b>1.15</b>         |
|                                  | <b>95% CI</b>                                        | <b>(1.14; 1.25)</b> | <b>(1.13; 1.26)</b> | <b>(1.11; 1.22)</b> | <b>(1.08; 1.18)</b> | <b>(1.13; 1.28)</b> | <b>(1.16; 1.32)</b> | <b>(1.10; 1.21)</b> | <b>(1.10; 1.23)</b> | <b>(1.10; 1.20)</b> |
|                                  | <b><i>P</i>-value</b>                                | <b>5.04E-13</b>     | <b>1.06E-10</b>     | <b>1.37E-10</b>     | <b>3.69E-08</b>     | <b>1.97E-08</b>     | <b>2.46E-11</b>     | <b>3.27E-08</b>     | <b>4.67E-08</b>     | <b>2.70E-09</b>     |
|                                  | <b><i>I</i><sup>2</sup> (<i>P</i><sub>het</sub>)</b> | <b>23.54 (0.23)</b> | <b>0 (0.95)</b>     | <b>0 (0.78)</b>     | <b>0 (0.53)</b>     | <b>0 (0.69)</b>     | <b>0 (0.83)</b>     | <b>0 (0.65)</b>     | <b>0 (0.55)</b>     | <b>0 (0.94)</b>     |

bp, base pairs; RAF, risk allele frequency; OR, odds ratio derived with respect to risk allele; *P*<sub>het</sub>, *P*-value for heterogeneity

<sup>a</sup> GEC data was excluded from the meta-analysis for rs7254272 due to imputation info score <0.8

**Supplementary Table 5: Summary statistics from all datasets for SNPs taken forward to replication phase that did not achieve genome-wide significance**

|                     |                 | SNP        |             |             |             |            |             |             |
|---------------------|-----------------|------------|-------------|-------------|-------------|------------|-------------|-------------|
|                     |                 | rs736009   | rs2071528   | rs1289214   | rs12654442  | rs2731567  | rs7026022   | rs8181768   |
| Locus               |                 | 1p34.2     | 1q42.3      | 5q21.2      | 5q23.2      | 7p21.1     | 9q22.33     | 12q24.22    |
| Position (bp, hg19) |                 | 40,146,417 | 236,228,681 | 103,418,704 | 124,343,851 | 18,164,761 | 102,562,216 | 117,000,196 |
| Study               | Risk allele     | T          | A           | A           | T           | C          | C           | A           |
|                     | Other allele    | G          | G           | C           | C           | G          | A           | G           |
| UK-CLL1             | Cases RAF       | 0.46       | 0.20        | 0.62        | 0.30        | 0.04       | 0.42        | 0.31        |
|                     | Controls RAF    | 0.44       | 0.18        | 0.59        | 0.25        | 0.04       | 0.37        | 0.29        |
|                     | OR <sup>a</sup> | 1.08       | 1.16        | 1.11        | 1.34        | 1.07       | 1.27        | 1.08        |
|                     | <i>P</i> -value | 0.3        | 0.1         | 0.1         | 0.0002      | 0.7        | 0.001       | 0.3300      |
| UK-CLL2             | Cases RAF       | 0.49       | 0.21        | 0.63        | 0.26        | 0.06       | 0.40        | 0.34        |
|                     | Controls RAF    | 0.45       | 0.18        | 0.58        | 0.24        | 0.04       | 0.37        | 0.29        |
|                     | OR              | 1.17       | 1.14        | 1.21        | 1.12        | 1.54       | 1.13        | 1.25        |
|                     | <i>P</i> -value | 0.001      | 0.03        | 0.0001      | 0.03        | 0.0001     | 0.02        | 0.00002     |
| GEC Consortium      | Cases RAF       | 0.50       | 0.20        | 0.63        | 0.27        | 0.07       | 0.39        | 0.32        |
|                     | Controls RAF    | 0.47       | 0.18        | 0.61        | 0.25        | 0.05       | 0.36        | 0.29        |
|                     | OR              | 1.14       | 1.20        | 1.11        | 1.13        | 1.38       | 1.11        | 1.13        |
|                     | <i>P</i> -value | 0.001      | 0.0001      | 0.009       | 0.004       | 0.00004    | 0.007       | 0.0033      |
| NHL GWAS Consortium | Cases RAF       | 0.49       | 0.21        | 0.63        | 0.29        | 0.06       | 0.38        | 0.33        |
|                     | Controls RAF    | 0.44       | 0.16        | 0.59        | 0.24        | 0.04       | 0.35        | 0.31        |
|                     | OR              | 1.26       | 1.37        | 1.18        | 1.32        | 1.38       | 1.09        | 1.16        |
|                     | <i>P</i> -value | 0.04       | 0.03        | 0.16        | 0.04        | 0.24       | 0.49        | 0.2         |
| UCSF                | Cases RAF       | 0.48       | 0.19        | 0.62        | 0.26        | 0.07       | 0.38        | 0.32        |
|                     | Controls RAF    | 0.47       | 0.18        | 0.60        | 0.24        | 0.05       | 0.37        | 0.26        |
|                     | OR              | 1.03       | 1.11        | 1.12        | 1.08        | 1.40       | 1.05        | 1.40        |
|                     | <i>P</i> -value | 0.7730     | 0.4588      | 0.3137      | 0.5487      | 0.1226     | 0.6415      | 0.0045      |



|                                  |                                                      |                     |                     |                     |                     |                     |                     |                     |             |
|----------------------------------|------------------------------------------------------|---------------------|---------------------|---------------------|---------------------|---------------------|---------------------|---------------------|-------------|
| Utah                             | Cases RAF                                            | 0.46                | 0.19                | 0.62                | 0.26                | 0.06                | 0.44                | 0.30                |             |
|                                  | Controls RAF                                         | 0.44                | 0.19                | 0.58                | 0.24                | 0.06                | 0.38                | 0.31                |             |
|                                  | OR                                                   | 1.06                | 1.04                | 1.11                | 1.18                | 0.84                | 1.28                | 0.97                |             |
|                                  | <i>P</i> -value                                      | 0.5746              | 0.7782              | 0.3321              | 0.1688              | 0.4484              | 0.0208              | 0.7948              |             |
| <b>Meta prior to replication</b> |                                                      | <b>OR</b>           | <b>1.14</b>         | <b>1.17</b>         | <b>1.14</b>         | <b>1.16</b>         | <b>1.34</b>         | <b>1.14</b>         | <b>1.16</b> |
|                                  | <b>95% CI</b>                                        | <b>(1.08;1.19)</b>  | <b>(1.10;1.25)</b>  | <b>(1.09;1.2)</b>   | <b>(1.10;1.23)</b>  | <b>(1.20;1.50)</b>  | <b>(1.08;1.20)</b>  | <b>(1.10;1.22)</b>  |             |
|                                  | <b><i>P</i>-value</b>                                | <b>4.96E-07</b>     | <b>6.67E-07</b>     | <b>2.88E-07</b>     | <b>1.30E-07</b>     | <b>1.22E-07</b>     | <b>3.67E-07</b>     | <b>6.71E-08</b>     |             |
| ICR replication                  | Cases RAF                                            | 0.48                | 0.20                | 0.61                | 0.26                | 0.04                | 0.39                | 0.30                |             |
|                                  | Controls RAF                                         | 0.46                | 0.19                | 0.60                | 0.25                | 0.05                | 0.38                | 0.29                |             |
|                                  | OR                                                   | 1.08                | 1.05                | 1.06                | 1.06                | 0.93                | 1.06                | 1.06                |             |
|                                  | <i>P</i> -value                                      | 0.2083              | 0.5720              | 0.3684              | 0.4201              | 0.6474              | 0.4146              | 0.4271              |             |
| ICGC replication                 | Cases RAF                                            | 0.46                | 0.20                | 0.60                | 0.23                | 0.07                | 0.37                | 0.30                |             |
|                                  | Controls RAF                                         | 0.48                | 0.22                | 0.61                | 0.22                | 0.07                | 0.36                | 0.28                |             |
|                                  | OR                                                   | 0.93                | 0.88                | 0.94                | 1.05                | 1.15                | 1.02                | 1.10                |             |
|                                  | <i>P</i> -value                                      | 0.4226              | 0.2355              | 0.5206              | 0.6267              | 0.4394              | 0.8711              | 0.35                |             |
| Mayo replication                 | Cases RAF                                            | 0.50                | 0.17                | 0.61                | 0.25                | 0.06                | 0.40                | 0.29                |             |
|                                  | Controls RAF                                         | 0.47                | 0.18                | 0.62                | 0.24                | 0.05                | 0.36                | 0.30                |             |
|                                  | OR                                                   | 1.15                | 0.98                | 0.99                | 1.05                | 1.29                | 1.21                | 0.97                |             |
|                                  | <i>P</i> -value                                      | 0.0762              | 0.8691              | 0.9198              | 0.6204              | 0.1407              | 0.0248              | 0.7328              |             |
| WHI replication                  | Cases RAF                                            | 0.47                | 0.19                | 0.59                | 0.24                | 0.06                | 0.36                | 0.31                |             |
|                                  | Controls RAF                                         | 0.45                | 0.21                | 0.55                | 0.24                | 0.06                | 0.33                | 0.30                |             |
|                                  | OR                                                   | 1.20                | 0.96                | 1.16                | 0.95                | 1.32                | 1.15                | 1.02                |             |
|                                  | <i>P</i> -value                                      | 0.2391              | 0.8164              | 0.3540              | 0.7718              | 0.3885              | 0.3866              | 0.8962              |             |
| <b>Meta post replication</b>     |                                                      | <b>OR</b>           | <b>1.12</b>         | <b>1.12</b>         | <b>1.11</b>         | <b>1.13</b>         | <b>1.28</b>         | <b>1.13</b>         | <b>1.13</b> |
|                                  | <b>95% CI</b>                                        | <b>(1.07; 1.17)</b> | <b>(1.06; 1.18)</b> | <b>(1.06; 1.16)</b> | <b>(1.08; 1.19)</b> | <b>(1.17; 1.40)</b> | <b>(1.08; 1.18)</b> | <b>(1.08; 1.18)</b> |             |
|                                  | <b><i>P</i>-value</b>                                | <b>2.25E-07</b>     | <b>4.64E-05</b>     | <b>3.42E-06</b>     | <b>5.27E-07</b>     | <b>1.48E-07</b>     | <b>7.00E-08</b>     | <b>4.12E-07</b>     |             |
|                                  | <b><i>I</i><sup>2</sup> (<i>P</i><sub>het</sub>)</b> | <b>0 (0.51)</b>     | <b>28.30 (0.18)</b> | <b>1.95 (0.42)</b>  | <b>0.55 (0.43)</b>  | <b>31.89 (0.15)</b> | <b>0 (0.55)</b>     | <b>33.64 (0.14)</b> |             |

bp, base pairs; RAF, risk allele frequency; OR, odds ratio derived with respect to the risk allele; *P*<sub>het</sub>, *P*-value for heterogeneity

**Supplementary Table 6: Concordance between imputed and directly typed SNP genotypes in a subset of UK and US CLL cases**

| SNP        | Genotype | UK-CLL2 cases                           |            |            |         |          | Mayo CLL cases    |            |            |         |          |
|------------|----------|-----------------------------------------|------------|------------|---------|----------|-------------------|------------|------------|---------|----------|
|            |          | Direct genotyping                       |            |            |         |          | Direct genotyping |            |            |         |          |
|            |          | Imputation                              | Concordant | Discordant | No data | $r^{2a}$ | Imputation        | Concordant | Discordant | No data | $r^{2a}$ |
| rs34673223 | AA       | 165                                     | 161        | 0          | 4       | 0.9954   | 123               | 123        | 0          | 0       | 0.9522   |
|            | Aa       | 114                                     | 109        | 1          | 4       |          | 92                | 90         | 2          | 0       |          |
|            | aa       | 18                                      | 18         | 0          | 0       |          | 15                | 16         | 1          | 0       |          |
| rs41271473 | AA       | 200                                     | 187        | 2          | 11      | 0.9889   | 144               | 144        | 0          | 0       | 1.0000   |
|            | Aa       | 84                                      | 80         | 0          | 4       |          | 71                | 71         | 0          | 0       |          |
|            | aa       | 13                                      | 12         | 0          | 1       |          | 15                | 15         | 0          | 0       |          |
| rs71597109 | AA       | 162                                     | 155        | 0          | 7       | 0.9959   | 121               | 117        | 4          | 0       | 0.9957   |
|            | Aa       | 110                                     | 108        | 0          | 2       |          | 92                | 93         | 1          | 0       |          |
|            | aa       | 25                                      | 24         | 1          | 0       |          | 17                | 17         | 0          | 0       |          |
| rs57214277 | AA       | 108                                     | 100        | 5          | 3       | 0.9665   | 73                | 74         | 1          | 0       | 0.9696   |
|            | Aa       | 148                                     | 147        | 1          | 0       |          | 115               | 111        | 4          | 0       |          |
|            | aa       | 41                                      | 41         | 0          | 0       |          | 42                | 45         | 3          | 0       |          |
| rs3800461  | AA       | 217                                     | 213        | 1          | 3       | 0.9866   | 165               | 165        | 0          | 0       | 0.9826   |
|            | Aa       | 73                                      | 71         | 1          | 1       |          | 58                | 58         | 0          | 0       |          |
|            | aa       | 7                                       | 7          | 0          | 0       |          | 7                 | 7          | 0          | 0       |          |
| rs61904987 | AA       | 220                                     | 211        | 2          | 7       | 0.9715   | 171               | 169        | 2          | 0       | 0.9957   |
|            | Aa       | 60                                      | 55         | 2          | 3       |          | 54                | 54         | 0          | 0       |          |
|            | aa       | 17                                      | 13         | 1          | 3       |          | 5                 | 5          | 0          | 0       |          |
| rs1036935  | AA       | Directly genotyped in discovery dataset |            |            |         |          | 131               | 130        | 1          | 0       | 0.9913   |
|            | Aa       |                                         |            |            |         |          | 82                | 82         | 0          | 0       |          |
|            | aa       |                                         |            |            |         |          | 17                | 18         | 1          | 0       |          |
| rs7254272  | AA       | Directly genotyped in discovery dataset |            |            |         |          | 148               | 156        | 8          | 0       | 0.8609   |
|            | Aa       |                                         |            |            |         |          | 76                | 64         | 8          | 0       |          |
|            | aa       |                                         |            |            |         |          | 6                 | 10         | 4          | 0       |          |

| SNP        | Genotype | UK-CLL2 cases                           |            |            |         |          | Mayo CLL cases    |            |            |         |          |
|------------|----------|-----------------------------------------|------------|------------|---------|----------|-------------------|------------|------------|---------|----------|
|            |          | Direct genotyping                       |            |            |         | $r^{2a}$ | Direct genotyping |            |            |         | $r^{2a}$ |
|            |          | Imputation                              | Concordant | Discordant | No data |          | Imputation        | Concordant | Discordant | No data |          |
| rs140522   | AA       |                                         |            |            |         |          | 94                | 94         | 0          | 0       | 0.9696   |
|            | Aa       | Directly genotyped in discovery dataset |            |            |         |          | 109               | 108        | 1          | 0       |          |
|            | aa       | Directly genotyped in discovery dataset |            |            |         |          | 27                | 28         | 1          | 0       |          |
| rs736009   | AA       | 85                                      | 83         | 1          | 1       | 0.9798   | 61                | 61         | 0          | 0       | 1.0000   |
|            | Aa       | 144                                     | 138        | 2          | 4       |          | 121               | 121        | 0          | 0       |          |
|            | aa       | 68                                      | 64         | 0          | 4       |          | 48                | 48         | 0          | 0       |          |
| rs2071528  | AA       | 194                                     | 185        | 0          | 9       | 0.9938   | 160               | 161        | 1          | 0       | 0.9957   |
|            | Aa       | 96                                      | 90         | 1          | 5       |          | 62                | 61         | 1          | 0       |          |
|            | aa       | 7                                       | 7          | 0          | 0       |          | 8                 | 8          | 0          | 0       |          |
| rs1289214  | AA       | 123                                     | 120        | 1          | 2       | 0.9962   | 92                | 93         | 1          | 0       | 1.0000   |
|            | Aa       | 138                                     | 138        | 0          | 0       |          | 113               | 112        | 1          | 0       |          |
|            | aa       | 36                                      | 36         | 0          | 0       |          | 25                | 25         | 0          | 0       |          |
| rs12654442 | AA       | 146                                     | 144        | 0          | 2       | 0.9955   | 113               | 112        | 1          | 0       | 1.0000   |
|            | Aa       | 132                                     | 131        | 1          | 0       |          | 94                | 95         | 1          | 0       |          |
|            | aa       | 19                                      | 19         | 0          | 0       |          | 23                | 23         | 0          | 0       |          |
| rs2731567  | AA       | 256                                     | 254        | 0          | 2       | 1.0000   | 210               | 211        | 1          | 0       | 0.9957   |
|            | Aa       | 41                                      | 41         | 0          | 0       |          | 20                | 19         | 1          | 0       |          |
|            | aa       | 0                                       | 0          | 0          | 0       |          | 0                 | 0          | 0          | 0       |          |
| rs7026022  | AA       |                                         |            |            |         |          | 86                | 86         | 0          | 0       | 1.0000   |
|            | Aa       | Directly genotyped in discovery dataset |            |            |         |          | 109               | 109        | 0          | 0       |          |
|            | aa       | Directly genotyped in discovery dataset |            |            |         |          | 35                | 35         | 0          | 0       |          |
| rs8181768  | AA       | 122                                     | 119        | 1          | 2       | 0.9870   | 94                | 94         | 0          | 0       | 1.0000   |
|            | Aa       | 150                                     | 142        | 2          | 6       |          | 110               | 110        | 0          | 0       |          |
|            | aa       | 25                                      | 24         | 0          | 1       |          | 26                | 26         | 0          | 0       |          |

<sup>a</sup>  $r^2$  indicates Pearson product-moment correlation coefficient between imputed and sequenced genotype.

**Supplementary Table 7: Relationship between genome-wide significant SNPs genotype and patient outcome (overall survival)**

| SNP        | Alleles <sup>a</sup> | UK               |          |                              |              | Mayo             |          |                              |              | Mayo Replication |          |
|------------|----------------------|------------------|----------|------------------------------|--------------|------------------|----------|------------------------------|--------------|------------------|----------|
|            |                      | HR (95% CI)      | <i>P</i> | Adj HR (95% CI) <sup>b</sup> | Adj <i>P</i> | HR (95% CI)      | <i>P</i> | Adj HR (95% CI) <sup>c</sup> | Adj <i>P</i> | HR (95% CI)      | <i>P</i> |
| rs34676223 | C/A                  | 1.04 (0.86-1.25) | 0.71     | 1.14 (0.93-1.40)             | 0.21         | 0.92 (0.65-1.28) | 0.61     | 0.83 (0.54-1.25)             | 0.37         | 0.97 (0.75-1.28) | 0.85     |
| rs41271473 | G/A                  | 0.81 (0.67-0.99) | 0.04     | 0.89 (0.71-1.10)             | 0.27         | 1.39 (1.00-1.95) | 0.05     | 1.38 (0.89-2.13)             | 0.14         | 1.1 (0.83-1.46)  | 0.52     |
| rs71597109 | C/T                  | 0.88 (0.73-1.10) | 0.21     | 0.83 (0.67-1.02)             | 0.08         | 0.91 (0.65-1.28) | 0.60     | 0.81 (0.54-1.22)             | 0.31         | 1.07 (0.83-1.40) | 0.6      |
| rs57214277 | C/T                  | 1.08 (0.91-1.28) | 0.41     | 1.01 (0.83-1.22)             | 0.94         | 1.19 (0.88-1.63) | 0.26     | 1.05 (0.71-1.55)             | 0.81         | 1.1 (0.86-1.39)  | 0.46     |
| rs3800461  | G/C                  | 0.97 (0.76-1.24) | 0.82     | 1.08 (0.83-1.40)             | 0.57         | 1.14 (0.77-1.70) | 0.51     | 1.12 (0.71-1.78)             | 0.63         | 1.04 (0.74-1.44) | 0.84     |
| rs61904987 | C/T                  | 0.88 (0.70-1.10) | 0.26     | 0.88 (0.68-1.13)             | 0.32         | 0.81 (0.51-1.29) | 0.37     | 0.72 (0.39-1.32)             | 0.29         | 1.16 (0.84-1.60) | 0.38     |
| rs1036935  | G/A                  | 1.01 (0.84-1.21) | 0.92     | 0.88 (0.68-1.13)             | 0.32         | 1.14 (0.81-1.59) | 0.46     | 1.01 (0.67-1.52)             | 0.98         | 0.96 (0.74-1.26) | 0.77     |
| rs7254272  | G/A                  | 0.99 (0.79-1.24) | 0.94     | 0.92 (0.71-1.18)             | 0.5          | 0.86 (0.58-1.27) | 0.44     | 0.79 (0.48-1.30)             | 0.35         | 0.86 (0.64-1.17) | 0.33     |
| rs140522   | C/T                  | 0.96 (0.81-1.14) | 0.63     | 1.11 (0.75-1.08)             | 0.27         | 1.13 (0.83-1.53) | 0.44     | 1.2 (0.82-1.75)              | 0.34         | 0.93 (0.73-1.18) | 0.53     |

HR, hazard ratio

<sup>a</sup> Major allele/minor allele. Hazard ratios are calculated with respect to the minor allele

<sup>b</sup> Adjustment for age, Binet stage at diagnosis and IGHV mutation status

<sup>c</sup> Adjustment for age, Rai stage at diagnosis and IGHV mutation status

**Supplementary Table 8: Transcription factor binding and motif annotation for 47 SNPs overlapping CLL ATAC-seq peaks**

| SNP         | Locus   | Position    | LD <sup>a</sup> | GERP <sup>b</sup> | Bound proteins (ENCODE ChIP-seq – all cells) <sup>c</sup>                                                                                        | Altered motifs from motifbreakR <sup>d</sup>                                    |
|-------------|---------|-------------|-----------------|-------------------|--------------------------------------------------------------------------------------------------------------------------------------------------|---------------------------------------------------------------------------------|
| rs2813876   | 1p36.11 | 23945914    | 0.29            | 2.60              | EZH2, HDAC1, RCOR1, ZNF143, HDAC2, <b>POLR2A, CTCF</b>                                                                                           | NHLH1, NR2E1, NR2F6, RARA                                                       |
| rs75569736  | 1p36.11 | 23946020    | 0.37            | 4.56              | EZH2, HDAC1, RCOR1, ZNF143, HDAC2, <b>POLR2A, CTCF, EGR1, BCL3</b> , E2F6, HMGN3, MYC, <b>FOXM1, MAZ</b>                                         | <b>EGR1, GATA1</b> , NRF1                                                       |
| rs72663260  | 1p36.11 | 23946443    | 0.37            | 4.22              | EZH2, <b>POLR2A</b> , HMGN3, <b>FOXM1, MAZ</b> , CTBP2, <b>EP300, RELA, TCF12, TAF1</b> , E2F1, <b>MEF2A, ELF1, NFYB</b> , TBP, MAX, <b>ZEB1</b> | GRHL1, MYB, NR1H, RFX5, SCRT1, SCRT2, TFCP2                                     |
| rs12136157  | 1q42.13 | 228703236   | 0.26            | 0.20              | PML, MYC, MAZ, <b>CTCF, SMC3</b> , RFX5, RCOR1, <b>RAD21</b>                                                                                     | ARID3A, CPEB1, HOXC12, HOXC13, HOXD10, HOXD11, IRF1, PRDM1, SOX10, SOX8, T1ISRE |
| rs55724370  | 1q42.13 | 228782630   | 0.30            | 0.14              | <b>BHLHE40</b> , POLR2A, CHD2, TBP, BRCA1                                                                                                        | JUND, CACBP, GTF2I, IRF5, NR0B1, PAX5, UA7, WT1                                 |
| rs7683892   | 4q24    | 102712542   | 0.36            | -2.65             | TCF7L2, TCF12, EZH2                                                                                                                              | GFY, PAX3, PURA, UA8, HIVEP1, ZFX                                               |
| rs4414957   | 4q24    | 102723246   | 0.42            | 0.23              | <b>SPI1</b>                                                                                                                                      | MTF1, THRB                                                                      |
| rs4610336   | 4q24    | 102772299   | 0.37            | 0.43              |                                                                                                                                                  | POU5F1, FOS, HNF4A, IRF5, MTF1, NR2F6, POU2F1, POU2F2, POU, RXRA, TBR1          |
| rs4698971   | 4q24    | 102772861   | 0.47            | -0.17             | <b>RELA</b>                                                                                                                                      | BCL3, MZF1, <b>NFKB (RELA)</b> , HIVEP2                                         |
| rs199914135 | 4q24    | 102777542-5 | 0.45            | -1.80             |                                                                                                                                                  |                                                                                 |
| rs34210876  | 4q24    | 102777543-6 | 0.5             | -1.43             |                                                                                                                                                  |                                                                                 |

| SNP        | Locus  | Position  | LD <sup>a</sup> | GERP <sup>b</sup> | Bound proteins (ENCODE ChIP-seq – all cells) <sup>c</sup>                                                                                                                                                                                                                                                                                                                                                                                                                                                                                         | Altered motifs from motifbreakR <sup>d</sup>                                                                                                                                                              |
|------------|--------|-----------|-----------------|-------------------|---------------------------------------------------------------------------------------------------------------------------------------------------------------------------------------------------------------------------------------------------------------------------------------------------------------------------------------------------------------------------------------------------------------------------------------------------------------------------------------------------------------------------------------------------|-----------------------------------------------------------------------------------------------------------------------------------------------------------------------------------------------------------|
| rs11933157 | 4q24   | 102792348 | 0.48            | 2.11              |                                                                                                                                                                                                                                                                                                                                                                                                                                                                                                                                                   | AIRE, FOS, CDX1, CDX2, FOXC1, FOXF1, FOXI1, FOXJ2, FOXJ3, FOXL1, FOXO1, FOXO4, FOXP1, FOXP2, FOXQ1, HOXA11, HOXA13, HOXB13, HOXC13, HOXD13, IRX2, IRX5, DMC1, NANOG, SOX2-OCT4, POU5F1, SOX2, TBP, ZNF143 |
| rs2216546  | 4q24   | 102793500 | 0.51            | -6.06             |                                                                                                                                                                                                                                                                                                                                                                                                                                                                                                                                                   | EP300, MECOM, FOXA1, FOXO1, FOXO3, FOXO4, GATA, HDAC2, IRF3, IRF4, IRF5, IRF7, OBOX5, RUNX1, T1ISRE, TEF, TRIM28                                                                                          |
| rs2850375  | 4q24   | 102893970 | 0.24            | -1.12             |                                                                                                                                                                                                                                                                                                                                                                                                                                                                                                                                                   | ARNT, CDX1, HIF1A, HIF2A, HOXA10, ZSCAN4                                                                                                                                                                  |
| rs2850378  | 4q24   | 102915967 | 0.23            | 2.01              |                                                                                                                                                                                                                                                                                                                                                                                                                                                                                                                                                   | CDX1, CDX2, GFI1B, HOXA10, HOXA11, HOXA13, HOXC10, HOXC11, HOXC12, HOXD13, HOXD9, SREBF1, JUN                                                                                                             |
| rs62322738 | 4q24   | 102929034 | 0.21            | 0.07              | <b>ATF2</b>                                                                                                                                                                                                                                                                                                                                                                                                                                                                                                                                       | JUN, HDAC2, HMGA2, LHX2, MEOX2, POU1F1, POU2F3, POU3F3, POU4F2, UA10                                                                                                                                      |
| rs12510921 | 4q35.1 | 185189278 | 0.35            | 1.12              | RBBP5, YY1, <b>POLR2A</b> , E2F6, <b>MAX</b> , MYC, <b>NFATC1</b> , <b>IKZF1</b> , <b>RELA</b> , <b>CEBPB</b> , <b>BCLAF1</b> , IRF1, <b>MXI1</b> , <b>RUNX3</b> , <b>CHD2</b> , <b>TAF1</b> , SIN3AK20, <b>TBP</b> , <b>NFIC</b> , <b>EBF1</b> , STAT1, STAT2, <b>EP300</b> , <b>ATF2</b> , <b>BHLHE40</b> , <b>IRF4</b> , <b>FOXM1</b> , <b>SRF</b> , <b>POU2F2</b> , <b>BATF</b> , <b>MEF2C</b> , <b>PML</b> , <b>MTA3</b> , <b>EGR1</b> , <b>MEF2A</b> , <b>PAX5</b> , <b>SPI1</b> , <b>RAD21</b> , <b>SMC3</b> , <b>BCL11A</b> , <b>ELF1</b> | BCLAF1, MAFB                                                                                                                                                                                              |

| SNP        | Locus   | Position  | LD <sup>a</sup> | GERP <sup>b</sup> | Bound proteins (ENCODE ChIP-seq – all cells) <sup>c</sup>                                                                                                                                                                                                                | Altered motifs from motifbreakR <sup>d</sup>                |
|------------|---------|-----------|-----------------|-------------------|--------------------------------------------------------------------------------------------------------------------------------------------------------------------------------------------------------------------------------------------------------------------------|-------------------------------------------------------------|
| rs1217971  | 4q35.1  | 185209881 | 0.23            | -0.83             | <b>POLR2A, MTA3, NFATC1, RUNX3, BCLAF1, RELA, NFIC, BCL3, POU2F2, CEBPB, PML, MAZ, EP300, MEF2C, FOXM1, ATF2, IKZF1, RAD21, SMC3, SPI1, SP1, BATF, BCL11A, CHD2, BHLHE40, STAT3, TBL1XR1, MEF2A, MAX, MXI1, WRNIP1, TBP, IRF4, RCOR1, CHD1</b>                           | AIRE                                                        |
| rs1217972  | 4q35.1  | 185210039 | 0.23            | 1.27              | <b>POLR2A, NFATC1, RELA, NFIC, POU2F2, CEBPB, PML, MAZ, EP300, FOXM1, IKZF1, CHD2, BHLHE40, STAT3, TBL1XR1, MAX, MXI1, WRNIP1, TBP, RCOR1, CHD1, TAF1, EBF1, PAX5, YY1, ESR1, RAD21</b>                                                                                  | <b>NFKB (RELA)</b> , PRDM1, PTF1A, REL, RELB, RREB1, ZBTB33 |
| rs793892   | 4q35.1  | 185249147 | 0.32            | -2.03             | <b>POLR2A, CHD1, TBP, WRNIP1, MTA3</b>                                                                                                                                                                                                                                   | CTCF, E2F3, E2F4, E2F2, IRX2, IRX3, NR2E1, RAD21            |
| rs13149699 | 4q35.1  | 185251371 | 0.83            | 2.43              | <b>POLR2A, TBP, RELA, TAF1, RUNX3, MXI1, CEBPB, NFYB, IRF4, TBL1XR1, NFIC, ATF2, EBF1, SMC3, ELF1, PAX5, MAX, CHD2, EP300, YY1, MEF2A, POU2F2, RAD21, MTA3, MEF2C, PML, FOXM1, NFATC1, EGR1, CTCF, BHLHE40, SP1, FOXA2, BCL11A, USF2, USF1, FOXA1, SPI1, TCF3, TCF12</b> | <b>EP300</b> , GATA2, <b>SPI1</b> , SPIB, SPIC              |
| rs793899   | 4q35.1  | 185252818 | 0.92            | -2.71             | EP300, GATA3, ESR1                                                                                                                                                                                                                                                       | BHLHE41, TCF4, LMO2, MYOD1, NRF1, TCF3, TFE3, ZEB1          |
| rs793900   | 4q35.1  | 185253019 | 0.92            | -1.45             | ESR1                                                                                                                                                                                                                                                                     | E2F2, HOXA13, HOXB13, HOXC13, HOXD13, MYEF2, NR2E1, NR4A2   |
| rs3800456  | 6p21.31 | 34664207  | 0.45            | 1.12              | RBBP5, MAX, <b>CHD1</b> , SAP30, <b>SIN3A</b> , ELF1, <b>POLR2A</b> , HDAC2, <b>TAF1</b> , UBTF, PHF8, SIN3AK20                                                                                                                                                          | EGR1, EGR3, IRF1, SP1, TBP, YY1, ZNF143                     |
| rs9469860  | 6p21.31 | 34724815  | 0.67            | -1.58             | CBX3, <b>CTCF</b> , <b>POLR2A</b> , <b>RUNX3</b> , BCL3, TCF12, <b>PML</b> , MAX, <b>NFIC</b> , MYC, <b>USF2</b> , <b>USF1</b> , BHLHE40, ATF3, TEAD4, <b>ATF2</b> , REST                                                                                                | CEBP, EBF1, PAX5, RFX2, SOX4, TLX1                          |

| SNP         | Locus   | Position   | LD <sup>a</sup> | GERP <sup>b</sup> | Bound proteins (ENCODE ChIP-seq – all cells) <sup>c</sup>                                                                                                                                                                                                                                     | Altered motifs from motifbreakR <sup>d</sup>                                                                             |
|-------------|---------|------------|-----------------|-------------------|-----------------------------------------------------------------------------------------------------------------------------------------------------------------------------------------------------------------------------------------------------------------------------------------------|--------------------------------------------------------------------------------------------------------------------------|
| rs111498384 | 6p21.31 | 34759503-6 | 0.69            | 0.69              | <b>CTCF, POLR2A</b> , CHD1, BHLHE40, NR2F2, CBX3, TEAD4, NFIC, PHF8, RBBP5, SIN3A, E2F1, PML, KAP1, GATA1                                                                                                                                                                                     |                                                                                                                          |
| rs13215181  | 6p21.31 | 34759881   | 0.25            | -2.35             | <b>CTCF, POLR2A</b> , PHF8, RBBP5, SIN3A, E2F1, PML, KAP1, GATA1, KDM5B, TFAP2C, HMGN3, IRF1, <b>TAF1</b> , GABPA, MAX, ARID3A, MXI1, E2F4, MAZ, TBP, <b>YY1, ELF1</b> , SIN3AK20, CEBPD, MYC, GTF2B, <b>RAD21, SRF</b> , GRp20, <b>PAX5, EGR1, TCF3</b> , ZBTB7A, CCNT2, CHD1, ETS1, SMARCB1 | <b>E2F1, RAD21, SMC3, SRF</b>                                                                                            |
| rs6934662   | 6p21.31 | 34759884   | 0.25            | 1.76              | <b>CTCF, POLR2A</b> , PHF8, RBBP5, SIN3A, E2F1, PML, KAP1, GATA1, KDM5B, TFAP2C, HMGN3, IRF1, <b>TAF1</b> , GABPA, MAX, ARID3A, MXI1, E2F4, MAZ, TBP, <b>YY1, ELF1</b> , SIN3AK20, CEBPD, MYC, GTF2B, <b>RAD21, SRF</b> , GRp20, <b>PAX5, EGR1, TCF3</b> , ZBTB7A, CCNT2, CHD1, ETS1, SMARCB1 |                                                                                                                          |
| rs7769961   | 6p21.31 | 34760162   | 0.22            | 1.65              | <b>POLR2A</b> , PHF8, RBBP5, E2F1, HMGN3, SIN3AK20, CCNT2, CHD1, ETS1, SMARCB1, NR2F2, E2F6                                                                                                                                                                                                   | KLF15, NR0B1, SMAD1, SMAD3, ZNF143                                                                                       |
| rs7769820   | 6p21.31 | 34760228   | 0.22            | -5.72             | <b>POLR2A</b> , PHF8, RBBP5, HMGN3, SIN3AK20, CCNT2, CHD1, SMARCB1, NR2F2, E2F6                                                                                                                                                                                                               | BCLAF1, EGR1, ELF1, GLIS2, GLIS3, MAZ, PLAG1, POU2F2, SETDB1, SIN3A, SRF, TAF1, UA5, WT1, ZBTB7B, ZNF219, ZNF143, ZNF281 |
| rs7752060   | 6p21.31 | 34760325   | 0.21            | 3.59              | <b>POLR2A</b> , PHF8, RBBP5, CHD1, SMARCB1, NR2F2, E2F6, ZNF263                                                                                                                                                                                                                               | CACD,DMRTC2,KLF1,KLF4,KLF7,MAZ,PA TZ1,PPARA,RFX4,RREB1,SP1,SP3,ZBTB 7B,ZNF219                                            |
| rs2513573   | 11q23.2 | 113718477  | 0.47            | -0.16             | <b>MEF2C, MEF2A</b>                                                                                                                                                                                                                                                                           | BCL6B, <b>MEF2C</b> , POU2F2, TBP                                                                                        |
| rs746263    | 18q21.1 | 47834577   | 0.75            | 0.92              | <b>POLR2A</b> , JUND, STAT3, ELF1, NR3C1                                                                                                                                                                                                                                                      | CACD, KLF1, EP300, TOPORS, ZNF628, ZSCAN4                                                                                |



| SNP        | Locus   | Position | LD <sup>a</sup> | GERP <sup>b</sup> | Bound proteins (ENCODE ChIP-seq – all cells) <sup>c</sup>                                                                                                                                                                                                                                                          | Altered motifs from motifbreakR <sup>d</sup>                                                                                                               |
|------------|---------|----------|-----------------|-------------------|--------------------------------------------------------------------------------------------------------------------------------------------------------------------------------------------------------------------------------------------------------------------------------------------------------------------|------------------------------------------------------------------------------------------------------------------------------------------------------------|
| rs9949024  | 18q21.1 | 47839240 | 0.99            | 0.24              | <b>BCLAF1, NFIC, IRF4, POU2F2, RELA, SP1, EP300, BATF, EBF1, MTA3, PAX5, RUNX3, SPI1, MEF2C, FOXM1, NFATC1, BCL11A, MEF2A</b>                                                                                                                                                                                      | BARHL2, BARX1, EN1, GBX2, HERPUD1, HESX1, HMX1, HMX3, HOXA5, HOXB6, ISX, LHX9, MAFK, MSX1, MSX2, NOBOX, PRDM9, RFX2, RFX3, RFX4, RHOXF1, SOX10, SOX8, SOX9 |
| rs1373184  | 18q21.1 | 47841892 | 1               | -0.47             | <b>PML, MTA3, STAT5A, RELA, NFATC1, FOXM1, CEBPB, TBL1XR1, NFYB, EP300, BCL3, NFIC, RUNX3, PAX5, POU2F2, IRF4, MEF2A, EBF1, SP1, MEF2C, BCL11A, RAD21</b>                                                                                                                                                          | ETV7, HBP1, NKX3-1, NR2E1, NR2F6, POU4F1, POU4F2, POU4F3, ZFHX3                                                                                            |
| rs3862689  | 18q21.1 | 47847254 | 0.96            | 0.16              | <b>FOXM1, NFIC, POU2F2, TBP, EP300, MEF2A, MEF2C, RUNX3</b>                                                                                                                                                                                                                                                        | FOXP3, HSF2, POU2F1, SIX1                                                                                                                                  |
| rs7504604  | 18q21.1 | 47847364 | 0.97            | 0.16              | <b>FOXM1, NFIC, POU2F2, TBP, EP300, MEF2A, MEF2C, RUNX3</b>                                                                                                                                                                                                                                                        | NKX2-1, NKX2-6, CBF3, RUNX1, RUNX2, SRF, UA11                                                                                                              |
| rs11663953 | 18q21.1 | 47901471 | 0.27            | 1.47              | <b>PML, RBBP5, MTA3, POLR2A, GABPA, TAF1, MYC, RELA, KDM5B, TBP, PAX5, HMG3, MAX, MAZ, YY1, REST, CCNT2, JUND, CHD2, FOS, ELF1, E2F6, ELK1, SIN3A, FOXM1, CEBPD, IRF1, SP1, BRCA1, E2F4, TCF12, CEBPB, FOXP2, MXI1, IRF4, ATF3, THAP1, CREB1, ETS1, PBX3, NRF1, ATF2, SIN3AK20, MAFK, MAFF, PHF8, HDAC1, SAP30</b> | ZSCAN16                                                                                                                                                    |
| rs735842   | 19p13.3 | 4007080  | 0.28            | -4.06             | CHD1, RBBP5, <b>POLR2A</b>                                                                                                                                                                                                                                                                                         | CACD, CTCF, EBF1, KLF1, FOXO4, FOXO6, KLF3, KLF4, NR0B1, RBPJ, ZNF740, ZNF75A                                                                              |

| SNP         | Locus    | Position | LD <sup>a</sup> | GERP <sup>b</sup> | Bound proteins (ENCODE ChIP-seq – all cells) <sup>c</sup>                                                                                                                                                                                                                                                                                                                                                                                                                                                                                                                        | Altered motifs from motifbreakR <sup>d</sup>                                                                                        |
|-------------|----------|----------|-----------------|-------------------|----------------------------------------------------------------------------------------------------------------------------------------------------------------------------------------------------------------------------------------------------------------------------------------------------------------------------------------------------------------------------------------------------------------------------------------------------------------------------------------------------------------------------------------------------------------------------------|-------------------------------------------------------------------------------------------------------------------------------------|
| rs58300298  | 19p13.3  | 4058447  | 0.45            | 1.49              | POLR2A, SMARCC1, TFAP2C, CBX3, CCNT2, TFAP2A, HDAC2, RCOR1, JUNB, GTF2F1, MAZ, ZNF143, JUN, JUND, SIN3AK20, STAT3, E2F4, ZBTB7A, <b>CTCF</b> , CHD2, MAX, FOS, UBTF, EP300, CEBPB, <b>EGR1</b> , FOSL2, TAF1, SP1, TEAD4, MXI1, BRCA1, FOSL1, SMC3, <b>EBF1</b> , YY1, ATF3, TBP, RAD21                                                                                                                                                                                                                                                                                          |                                                                                                                                     |
| rs191258216 | 19p13.3  | 4065415  | 0.26            | 1.51              | <b>POLR2A</b> , RBBP5, ZBTB7A, <b>SIN3A</b> , FOSL1, <b>TAF1</b> , <b>TCF3</b>                                                                                                                                                                                                                                                                                                                                                                                                                                                                                                   | CHD2, CTCFL, EGR1, EGR2, EGR3, EGR4, GLIS2, GLIS3, HDAC2, INSM1, NRF1, RAD21, SMC3, SRF, ZBTB33, <b>ZBTB7A</b> , ZIC1, ZIC3, ZNF219 |
| rs188955288 | 19p13.3  | 4067314  | 0.82            | 1.63              | <b>POLR2A</b> , ZBTB7A, GATA1, HMG3, MAX, TAL1, MYC, TAF1, <b>EGR1</b> , <b>EBF1</b> , KDM5B, PHF8                                                                                                                                                                                                                                                                                                                                                                                                                                                                               | ATF4, EGR3, EGR4, MTF1, NR3C1, SP4, ZBTB7B, ZNF143                                                                                  |
| rs131806    | 22q13.33 | 50963965 | 0.66            | 1.54              | <b>POLR2A</b> , <b>STAT5A</b> , <b>NFIC</b> , MYBL2, <b>MYC</b> , <b>MAX</b> , BCL3, <b>PML</b> , SMARCB1, <b>TAF1</b> , E2F6, KDM5B, REST, TFAP2C, PHF8, <b>MXI1</b> , E2F1, IRF1, <b>MAZ</b> , CCNT2, RBBP5, ZKSCAN1, <b>RELA</b> , ELK1, <b>NRF1</b> , MAFK, <b>POU2F2</b> , <b>ZNF143</b> , <b>NFATC1</b> , CREB1, <b>SIN3A</b> , <b>ATF3</b> , <b>BHLHE40</b> , GABPA, <b>USF2</b> , <b>SP1</b> , JUN, <b>CHD2</b>                                                                                                                                                          | HNF4, HNF4G, MTF1, NR3C1, <b>NRF1</b> , <b>REST</b> , ZNF589                                                                        |
| rs131805    | 22q13.33 | 50964153 | 0.55            | -2.83             | <b>POLR2A</b> , <b>MYC</b> , <b>MAX</b> , <b>PML</b> , SMARCB1, <b>TAF1</b> , E2F6, REST, TFAP2C, <b>MXI1</b> , E2F1, IRF1, <b>MAZ</b> , CCNT2, RBBP5, ZKSCAN1, <b>RELA</b> , ELK1, <b>NRF1</b> , MAFK, <b>POU2F2</b> , <b>ZNF143</b> , <b>NFATC1</b> , CREB1, <b>SIN3A</b> , <b>ATF3</b> , <b>BHLHE40</b> , GABPA, <b>USF2</b> , <b>SP1</b> , JUN, <b>CHD2</b> , <b>USF1</b> , TBP, SIN3AK20, UBTF, <b>ELF1</b> , <b>E2F4</b> , TCF7L2, FOXP2, <b>EGR1</b> , <b>YY1</b> , EP300, CHD1, <b>CTCF</b> , <b>PBX3</b> , <b>PAX5</b> , <b>RAD21</b> , MAFF, <b>RUNX3</b> , SMC3, PHF8 | POLR3A, ETV6, <b>MAZ</b> , NFE2L2, SP4, SPI1, <b>TAF1</b> , <b>YY1</b>                                                              |

| SNP      | Locus    | Position | LD <sup>a</sup> | GERP <sup>b</sup> | Bound proteins (ENCODE ChIP-seq – all cells) <sup>c</sup>                                                                                                                                                                                   | Altered motifs from motifbreakR <sup>d</sup> |
|----------|----------|----------|-----------------|-------------------|---------------------------------------------------------------------------------------------------------------------------------------------------------------------------------------------------------------------------------------------|----------------------------------------------|
| rs131804 | 22q13.33 | 50964862 | 0.66            | -2.78             | <b>POLR2A, MYC, TAF1</b> , ZNF263, <b>TBP</b> , FOXP2, <b>ELF1, RELA</b> , PHF8, <b>MAZ, MAX</b> , CCNT2, <b>MXI1, BCL3, MEF2C, CTCF</b> , E2F6, YY1, HDAC2, <b>MTA3</b> , BACH1, <b>RAD21, ZNF143</b> , SMC3, <b>RUNX3</b> , ZBTB7A, CTCFL | <b>RAD21</b> , REST, ZFX                     |
| rs470118 | 22q13.33 | 50977738 | 0.32            | -0.42             | TFAP2C, <b>POLR2A, MYC</b> , TFAP2A, <b>MAX</b> , E2F6, <b>MXI1, USF1, TBL1XR1</b> , FOXP2, <b>USF2, CHD1, BHLHE40, E2F4, WRNIP1, CHD2, POU2F2, SMC3, NFATC1</b>                                                                            | BCLAF1, CTCF, EP300, GFY, KLF8, REST, SIN3A  |
| rs140521 | 22q13.33 | 50978024 | 0.34            | 0.76              | <b>POLR2A, MYC</b> , TFAP2A, E2F6, <b>CHD1, NFATC1, NFYB, PML, MTA3</b> , KAP1, <b>FOXO1, TAF1</b> , TCF12, MAFK, STAT1, STAT2, IRF1, <b>RUNX3, EP300, TBP, JUND, SP1, RELA, BCL11A</b> , STAT3                                             | ESRRA, LHX8, PDX1, POU2F1, RARA, ZEB1        |

LD, linkage disequilibrium; GERP, genomic evolutionary profiling rate

<sup>a</sup> LD ( $r^2$ ) with top SNP at locus

<sup>b</sup> GERP score above +2 is considered indicative of an evolutionarily constrained site.

<sup>c</sup> All proteins bound at the SNP site based on ChIP-seq data from the ENCODE project. Proteins bound in lymphoblastoid cell lines are emboldened

<sup>d</sup> Transcription factor binding motifs predicted to be altered by the SNP. Motifs that match a protein bound in ChIP-seq data are emboldened

**Supplementary Table 9: Primers used for replication genotyping. a) KASPar primers<sup>a</sup>; b) Sequenom primers**

**a)**

| SNP        | Allele 1 primer <sup>a</sup>     | Allele 2 primer                    | Common primer                  |
|------------|----------------------------------|------------------------------------|--------------------------------|
| rs34676223 | CAAACAAAAAGAAAAACGATACTACAAACG   | AACAAAAACAAAAAGAAAAACGATACTACAAACT | GTTTGACTCACCCCTTGAAACTCTAAGATA |
| rs736009   | CACTGGGTTGCTATCCTCTTGC           | CCACTGGGTTGCTATCCTCTTGA            | GTGGTTGCAAACCAGTGGTTGCTAT      |
| rs41271473 | GGATTGAGGCAGTTTGGTGCAC           | AGGATTGAGGCAGTTTGGTGCAT            | TGTGGAGATCAGAAAGTGACATTTGCTTT  |
| rs2071528  | CCCGCGCTCTGCTCCCC                | CCCGCGCTCTGCTCCCT                  | CCGGTGCCTGCGATTCTCGAAA         |
| rs71597109 | AGGACACCAGCTGGATTTTCG            | AGGACACCAGCTGGATTTCA               | GCGAAGGGAACATCAGAACACTCTA      |
| rs57214277 | CCTTTTGCCTTCCACATGACCG           | CCTTTTGCCTTCCACATGACCA             | GGAAGCGTGGCAGCTTCTGCTT         |
| rs1289214  | ATTATTTGCATATCAGTTGTCATGTGTTAG   | GAATTATTTGCATATCAGTTGTCATGTGTTAT   | GAAGATGAGAGCCAGCGTATATTTCAAAT  |
| rs12654442 | ATACTCCCATTGTGACAGGTAC           | ATACTCCCATTGTGACAGGTAT             | CAGAAAAGAATCTAACAGTCTAGTGAGAAA |
| rs3800461  | CCTCCAGCAGTGGTTGCC               | CCTCCAGCAGTGGTTGCCG                | GCCACTATGTTTTAGCATACCTTCTTCTA  |
| rs2731567  | GGTGTGTTGGAGGAAGTTGACTC          | GGTGTGTTGGAGGAAGTTGACTG            | ACCCTCATTCCCCAGGACTGCT         |
| rs7026022  | CCAATAAAAAAGGACCTCCAAATAAAAAAGTA | CAATAAAAAAGGACCTCCAAATAAAAAAGTC    | CTCTAGTCACAGGGGTCTGGTTAT       |
| rs61904987 | CCAGCCTAGAGACGGTGATCG            | CCAGCCTAGAGACGGTGATCA              | CAGATGCCAGTCAAAGCAGCTCTT       |
| rs8181768  | AGGCATCCTGACTCATGCAGTG           | AAAGGCATCCTGACTCATGCAGTA           | AAGAGGTCTACCTCCTGCTCAGATT      |
| rs1036935  | GTAGTTTTAAAAAATGGCCTCAAACCTCTTT  | AGTTTTAAAAAATGGCCTCAAACCTCTTC      | TATACTCAGTGGTCAAAGCAGTCAGAAA   |
| rs7254272  | GGCACGATGGTTCATTCC               | CGCTGGCACGATGGTTCATTCT             | GCCGTGGGGGGGTCTTGCTA           |
| rs140522   | CAAAGCACACACTCCATTTAATTATGTGT    | AAGCACACACTCCATTTAATTATGTGC        | TTCATGGACTTAAATAGATAAGTCCTCTCT |

<sup>a</sup> Allele 1 primers have a 5' FAM label – GAAGGTGACCAAGTTCATGCT, allele 2 primers have a 5' VIC label – GAAGGTCGGAGTCAACGGATT

b)

| SNP        | PCR primer 1                   | PCR primer 2                   | Extension primer         |
|------------|--------------------------------|--------------------------------|--------------------------|
| rs34676223 | ACGTTGGATGTGGTCGTAAGTGACAGAAAC | ACGTTGGATGCGAAGTTTACTCACCCTTG  | GGAGATAAAGGGGCCACTA      |
| rs736009   | ACGTTGGATGAGCTTGGTCCCAAGCTCTAC | ACGTTGGATGTGCAAACCAGTGGTTGCTA  | CCCCACCAGTGGTTGCTATCCCCA |
| rs41271473 | ACGTTGGATGTCGTTACCTAGGATTGAGGC | ACGTTGGATGTTTAGGGAGTGGTTCCTGTG | TTTGCTTTCGGTACTGTAATAC   |
| rs2071528  | ACGTTGGATGCTGCGATTCTCGAAACCAGC | ACGTTGGATGAACCCTAATCAGAGGACCAC | GTCCGCGCTCTGCTCCC        |
| rs71597109 | ACGTTGGATGATGCTAGCGAAGGGAACATC | ACGTTGGATGTACACAAATAGGACACCAGC | CCCCACACCAGCTGGATTTT     |
| rs57214277 | ACGTTGGATGTGCTCTGAGTATGTGATGCG | ACGTTGGATGTTCTGCTTCTCCGGAGACCT | CGGAGACCTCAGGAAACTTC     |
| rs1289214  | ACGTTGGATGGAGAGCCAGCGTATATTTT  | ACGTTGGATGTCTCCCTCTGAATTATTTGC | GCATATCAGTTGTCATGTGTTA   |
| rs12654442 | ACGTTGGATGAGTCTAGTGAGAAAGCTGCC | ACGTTGGATGCTCCTTCTCCATTTTGGTG  | CCCATTGTGACAGGTA         |
| rs3800461  | ACGTTGGATGGTCAGTATATCATCCACAGC | ACGTTGGATGAGTGGCCACTATGTTTTAGC | GCTGTCCTAAGTTAACCCTATAAA |
| rs2731567  | ACGTTGGATGAGCCAGATTTGATGATGAGG | ACGTTGGATGAGGACTGCTGCAGCTGTTC  | GCTGTTCTCAGCCAC          |
| rs7026022  | ACGTTGGATGGGATCATTGGATACATGCAG | ACGTTGGATGGGTTATGCCCCAGGAGTTTT | TATGACCCAGGAGTTTTTTCCATG |
| rs61904987 | ACGTTGGATGGAAAAGCCAGCCTAGAGACG | ACGTTGGATGTAGAAGCCAACCACTAGAGC | CCTTCCTCAGCCCCTA         |
| rs8181768  | ACGTTGGATGGATAAGAGGTCTACCTCCTG | ACGTTGGATGGTAAACAAAGGCATCCTGAC | CCCTCATCCTGACTCATGCAGT   |
| rs1036935  | ACGTTGGATGAACAGACCAACCTCTTGATG | ACGTTGGATGTGCTTGCAAAGTGATGGCTG | TAATGGCCTCAAACCTT        |
| rs7254272  | ACGTTGGATGACTCCTGGGCTTCAGTGTTT | ACGTTGGATGACCATGTAGAGCTTAGAGCC | GGAGATGGCACGATGGTTCATTC  |
| rs140522   | ACGTTGGATGTAATGCAAAGCACACTCC   | ACGTTGGATGGTGTGATTATTTTGTGGCCC | AAATAGATAAGTCCTCTCTCT    |

## Supplementary References

1. Wellcome Trust Case Control Consortium. Genome-wide association study of 14,000 cases of seven common diseases and 3,000 shared controls. *Nature* 447, 661-78 (2007).
2. Berndt, S.I. et al. Genome-wide association study identifies multiple risk loci for chronic lymphocytic leukemia. *Nat Genet* 45, 868-76 (2013).
3. Di Bernardo, M.C. et al. A genome-wide association study identifies six susceptibility loci for chronic lymphocytic leukemia. *Nat Genet* 40, 1204-10 (2008).
4. Crowther-Swanepoel, D. et al. Common variants at 2q37.3, 8q24.21, 15q21.3 and 16q24.1 influence chronic lymphocytic leukemia risk. *Nat Genet* 42, 132-6 (2010).
5. Berndt, S.I. et al. Meta-analysis of genome-wide association studies discovers multiple loci for chronic lymphocytic leukemia. *Nat Commun* 7(2016).
6. Speedy, H.E. et al. A genome-wide association study identifies multiple susceptibility loci for chronic lymphocytic leukemia. *Nat Genet* 46, 56-60 (2014).
7. Slager, S.L. et al. Common variation at 6p21.31 (BAK1) influences the risk of chronic lymphocytic leukemia. *Blood* 120, 843-6 (2012).
8. Slager, S.L. et al. Genome-wide association study identifies a novel susceptibility locus at 6p21.3 among familial CLL. *Blood* 117, 1911-1916 (2011).
9. Sava, G.P. et al. Common variation at 12q24.13 (OAS3) influences chronic lymphocytic leukemia risk. *Leukemia* 29, 748-51 (2015).
